# Supplementary material for: Equilibrium acidities of cinchona alkaloid organocatalysts bearing 6′-hydrogen bonding donors in DMSO
Source: Royal Society of Chemistry journal article supplement (doi:10.1039/c5qo00305a), 2015-12-09

Supporting Information for:  
**Equilibrium Acidities of Cinchona Alkaloid Organocatalysts  
Bearing 6'-Hydrogen Bonding Activator in DMSO**

Xiang Ni,<sup>a,b</sup> Xin Li,<sup>a,b</sup> \* and Jin-Pei Cheng<sup>b,c</sup>

<sup>a</sup> State Key Laboratory of Elemento-Organic Chemistry, Department of Chemistry, <sup>b</sup> Collaborative Innovation Center of Chemical Science and Engineering, Nankai University, Tianjin 300071, <sup>c</sup> Center of Basic Molecular Science, Department of Chemistry, Tsinghua University, Beijing 100084.

xin\_li@nankai.edu.cn

**Contents**

|                                                                                             |     |
|---------------------------------------------------------------------------------------------|-----|
| 1. UV/Vis spectra of the HIn anion in DMSO .....                                            | S2  |
| 2. Copies of <sup>1</sup> H NMR and <sup>13</sup> C NMR spectra for all new catalysts ..... | S23 |

## UV/Vis spectra of the HIn anion in DMSO

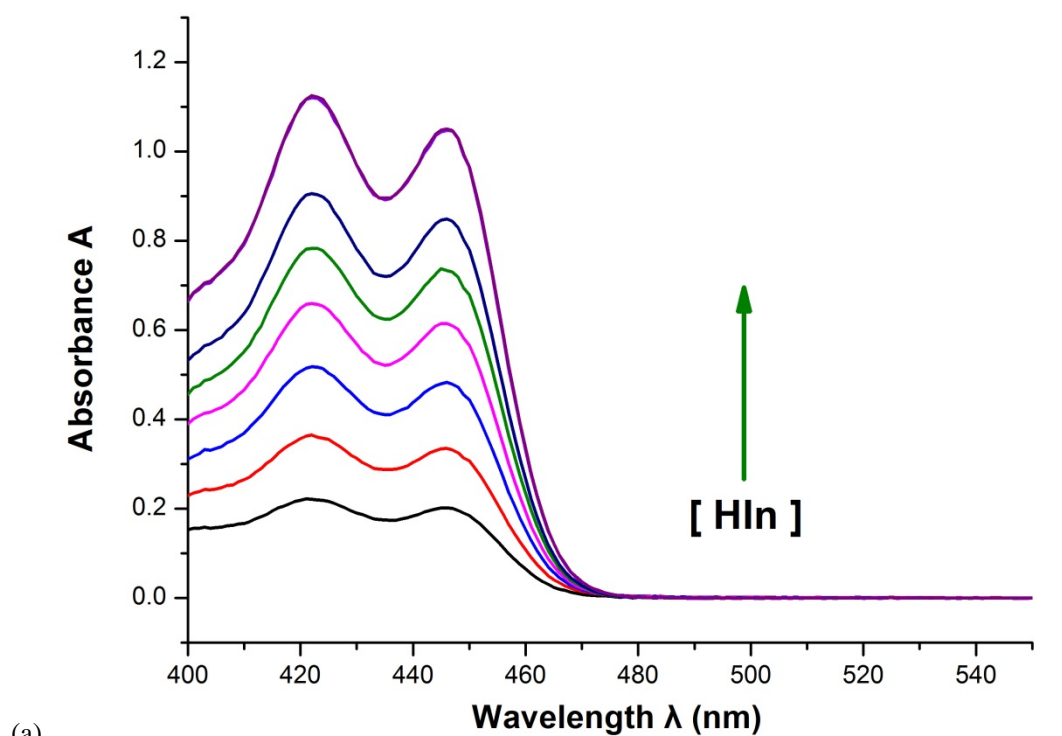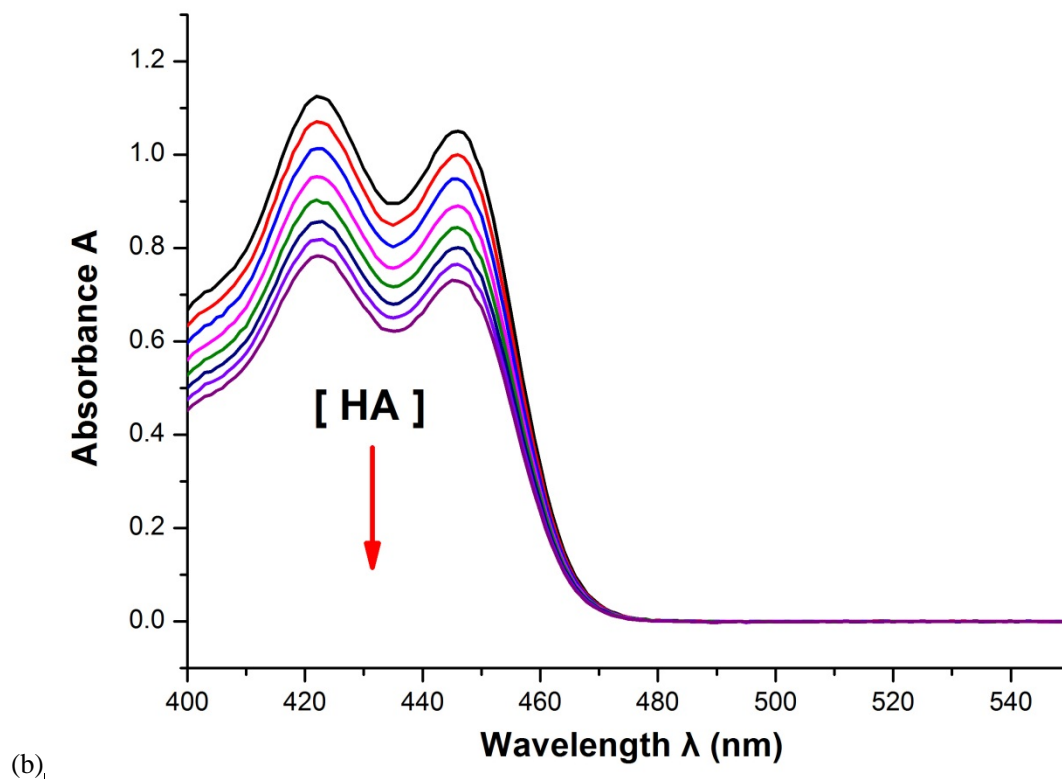

**Figure 1.** (a) Absorption spectra of the anion derived from 9-CN-FH for various added amount of 9-CN-FH during the titration. (b) Absorption spectra of the anion derived from 9-CN-FH for various added amount of catalyst 1 during the titration.

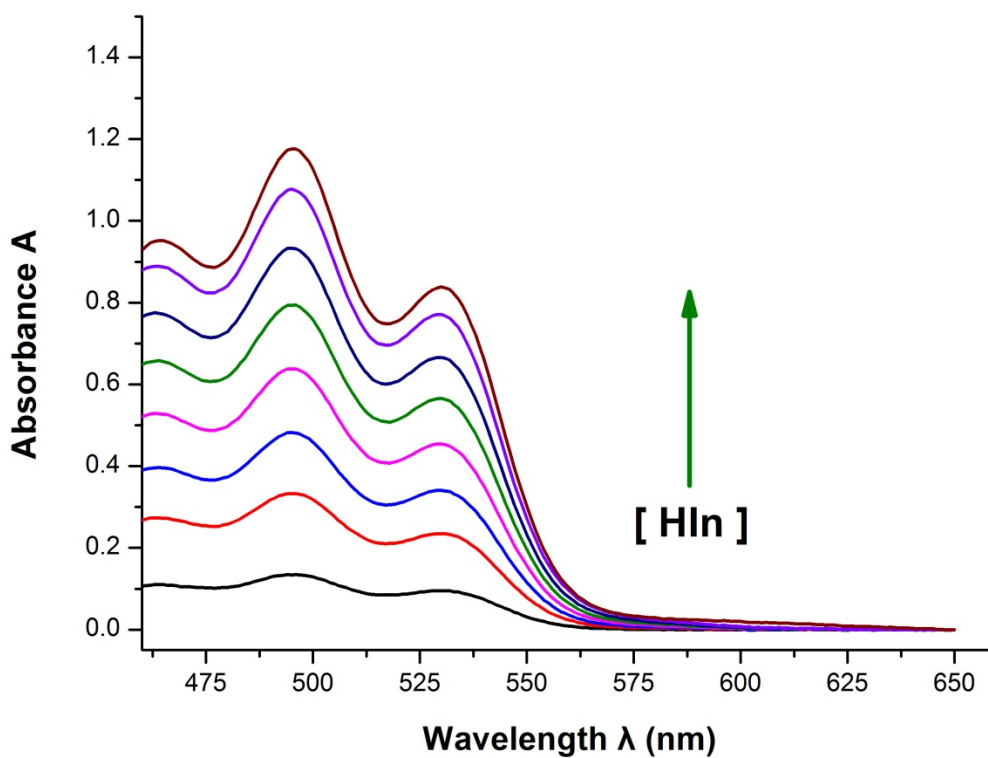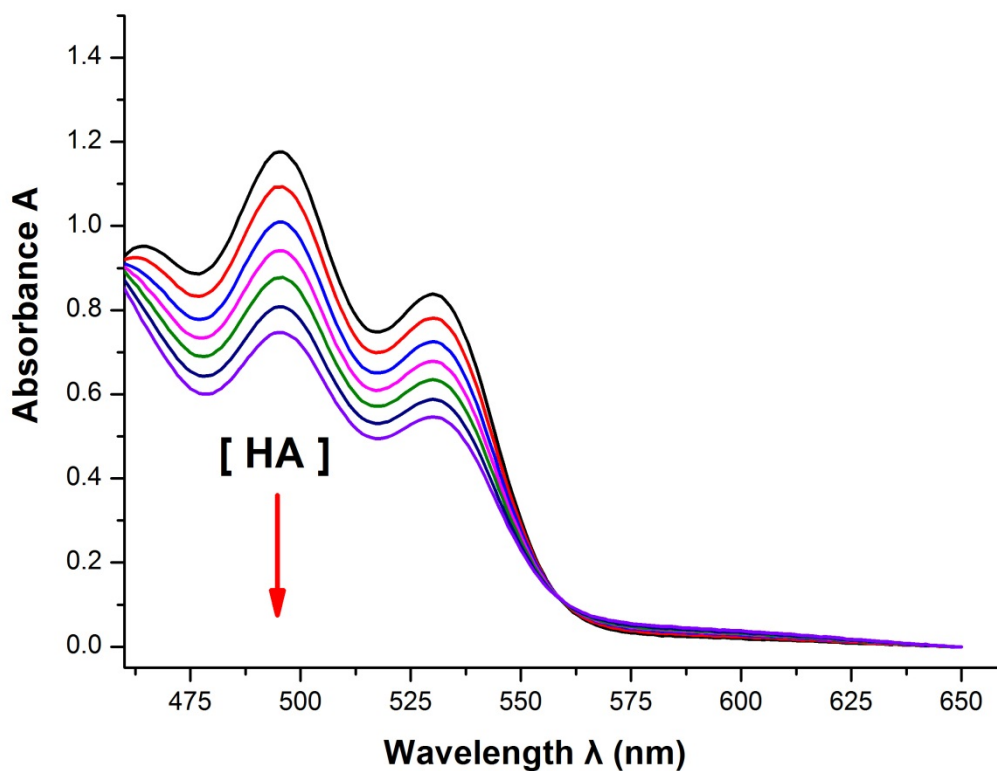

**Figure 2.** (a) Absorption spectra of the anion derived from **2-Br-9-Ph-FH** for various added amount of **2-Br-9-Ph-FH** during the titration. (b) Absorption spectra of the anion derived from **2-Br-9-Ph-FH** for various added amount of catalyst **2** during the titration.

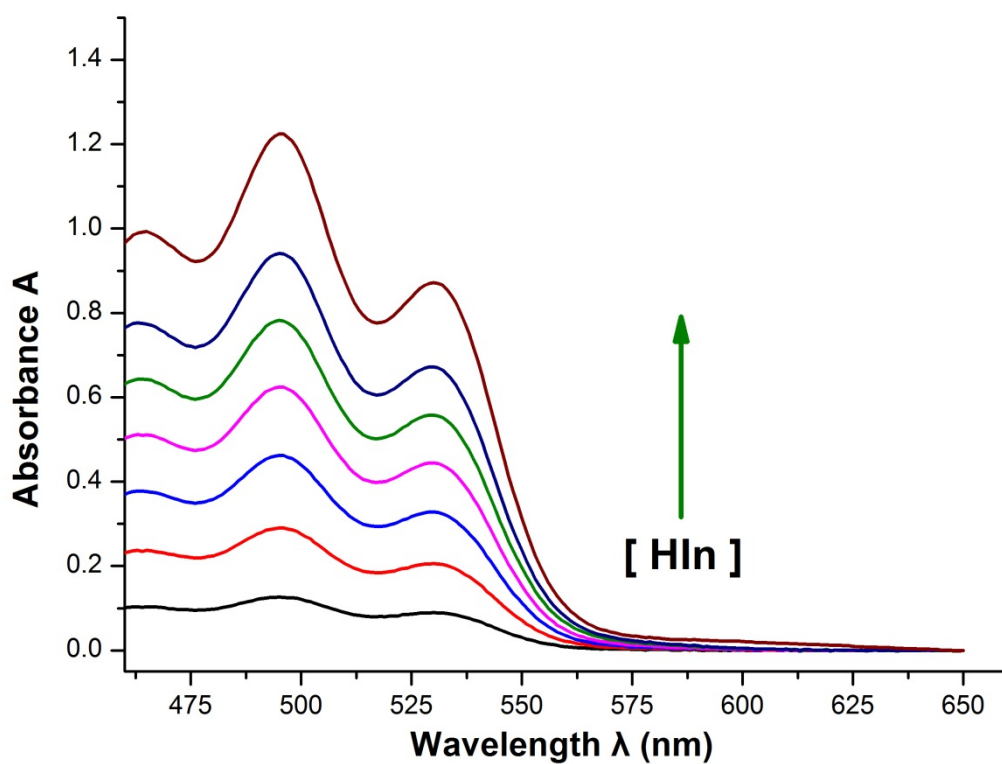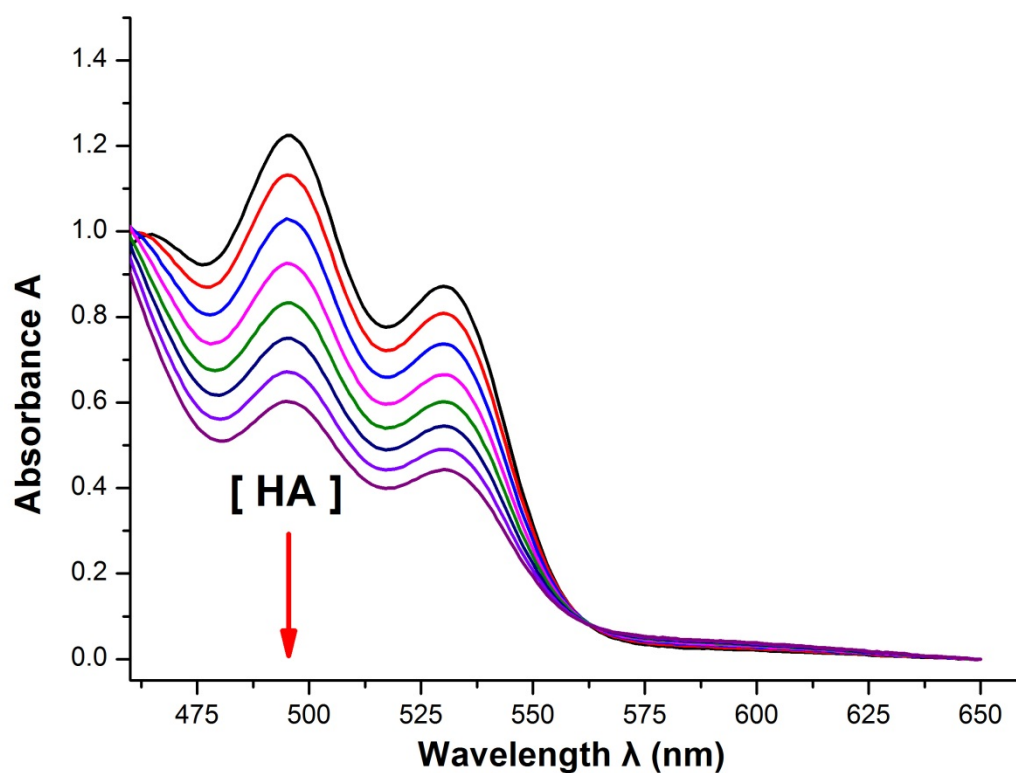

**Figure 3.** (a) Absorption spectra of the anion derived from **2-Br-9-Ph-FH** for various added amount of **2-Br-9-Ph-FH** during the titration. (b) Absorption spectra of the anion derived from **2-Br-9-Ph-FH** for various added amount of catalyst **3** during the titration.

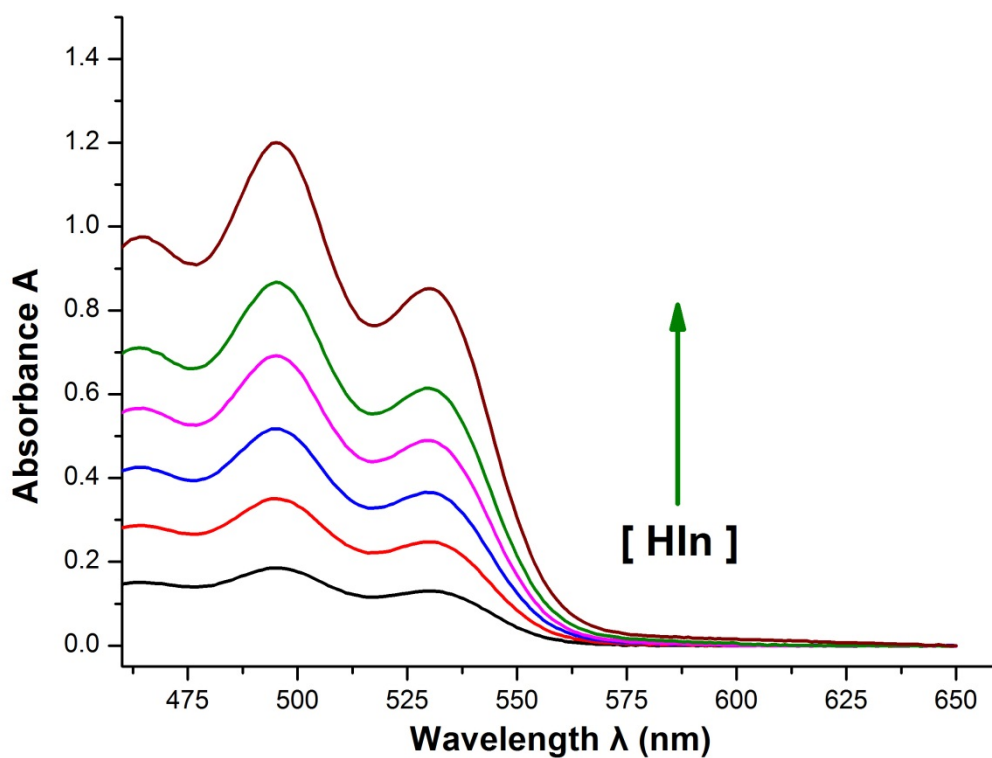

(a)

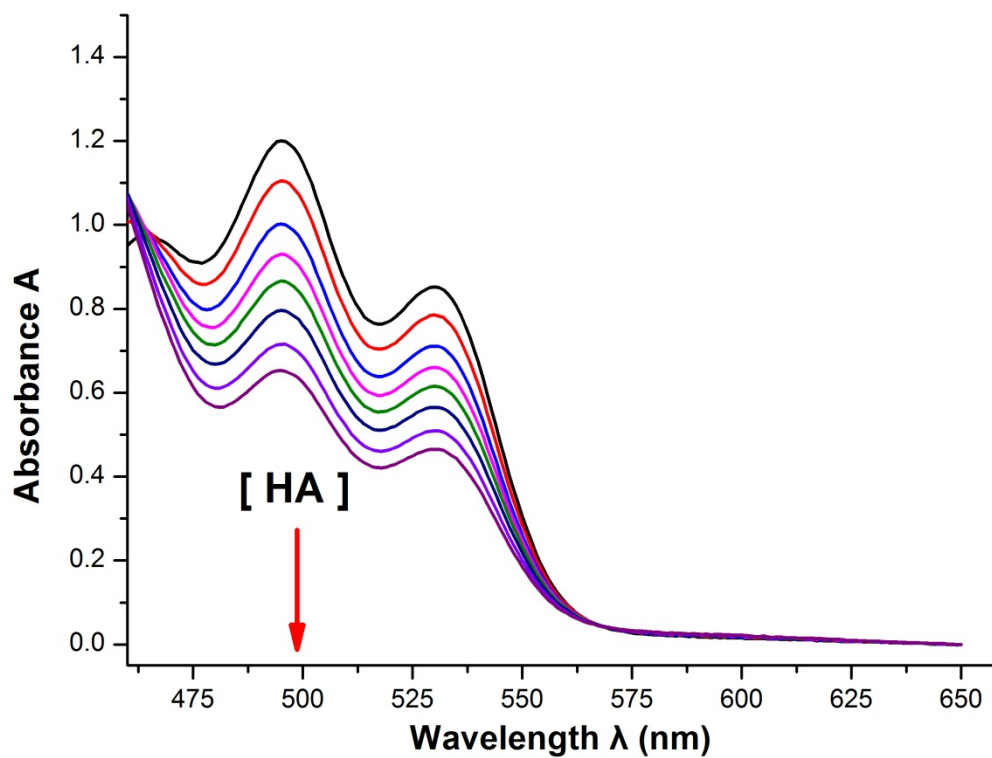

(b)

**Figure 4.** (a) Absorption spectra of the anion derived from **2-Br-9-Ph-FH** for various added amount of **2-Br-9-Ph-FH** during the titration. (b) Absorption spectra of the anion derived from **2-Br-9-Ph-FH** for various added amount of catalyst **4** during the titration.

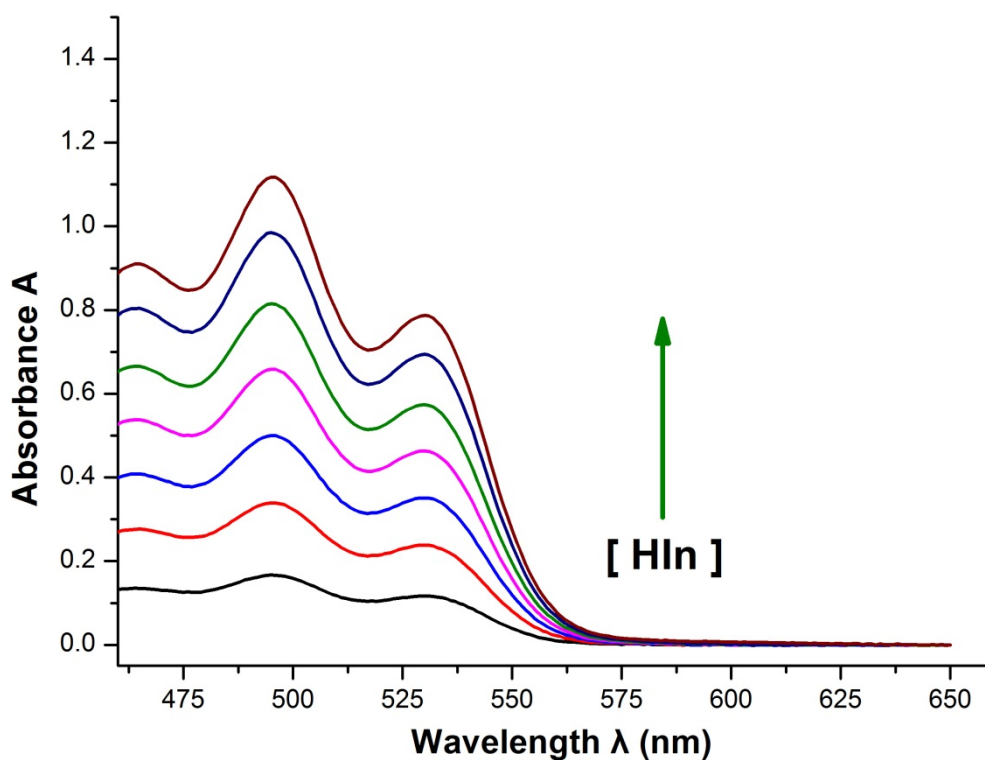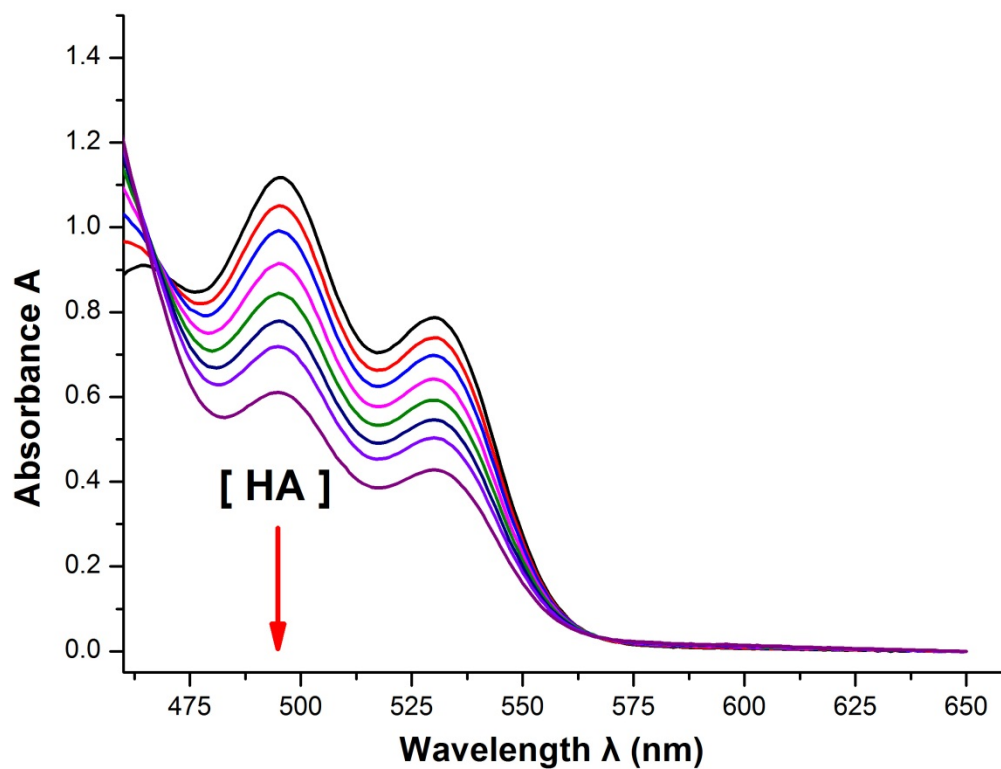

**Figure 5.** (a) Absorption spectra of the anion derived from **2-Br-9-Ph-FH** for various added amount of **2-Br-9-Ph-FH** during the titration. (b) Absorption spectra of the anion derived from **2-Br-9-Ph-FH** for various added amount of catalyst **5** during the titration.

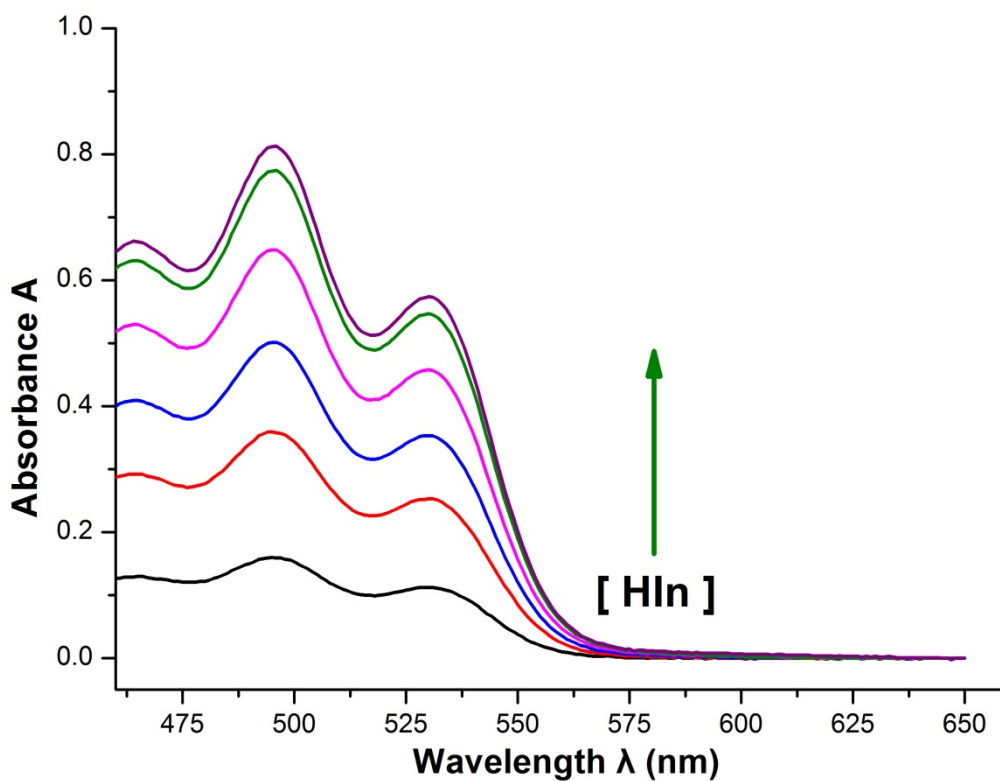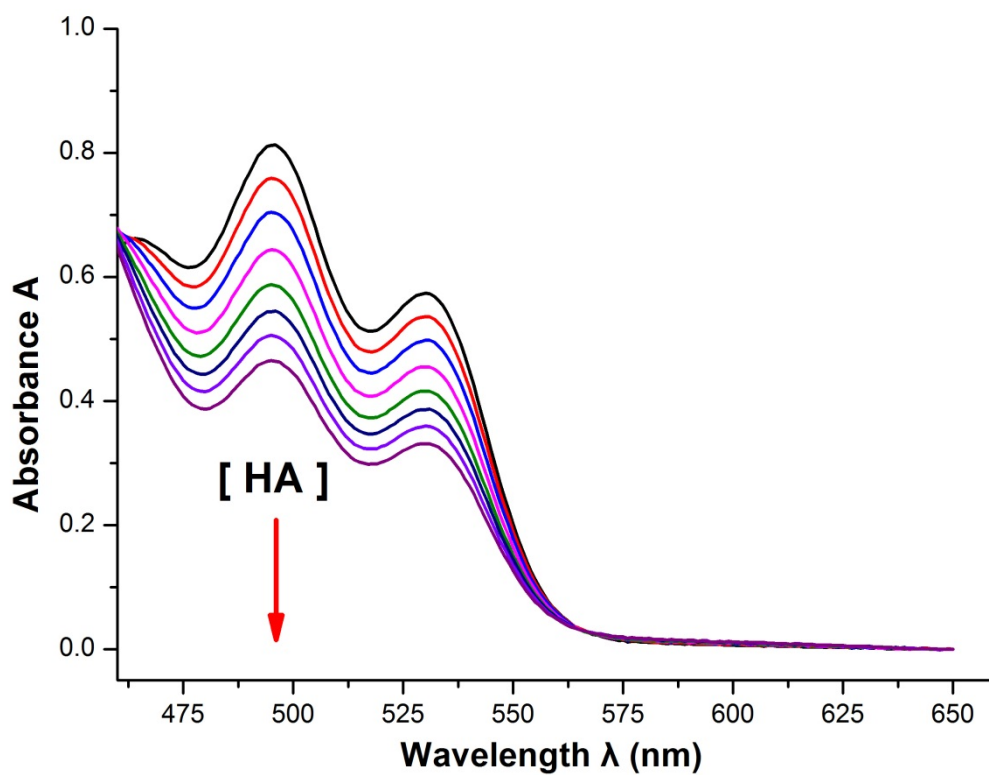

**Figure 6.** (a) Absorption spectra of the anion derived from **2-Br-9-Ph-FH** for various added amount of **2-Br-9-Ph-FH** during the titration. (b) Absorption spectra of the anion derived from **2-Br-9-Ph-FH** for various added amount of catalyst **6** during the titration.

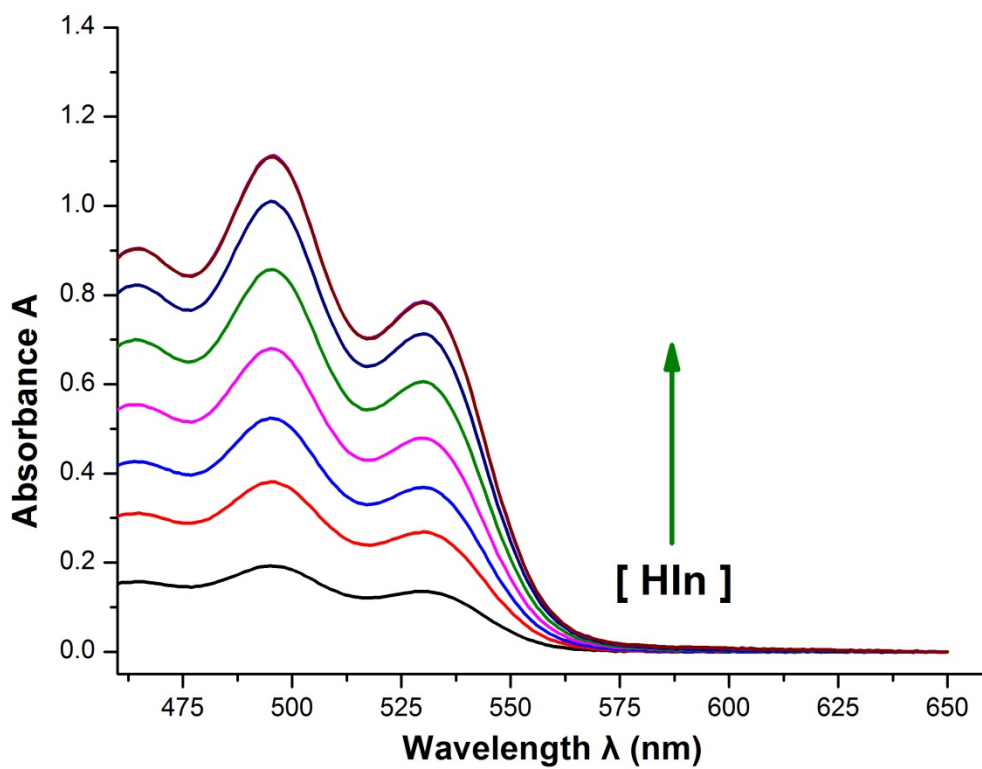

(a),

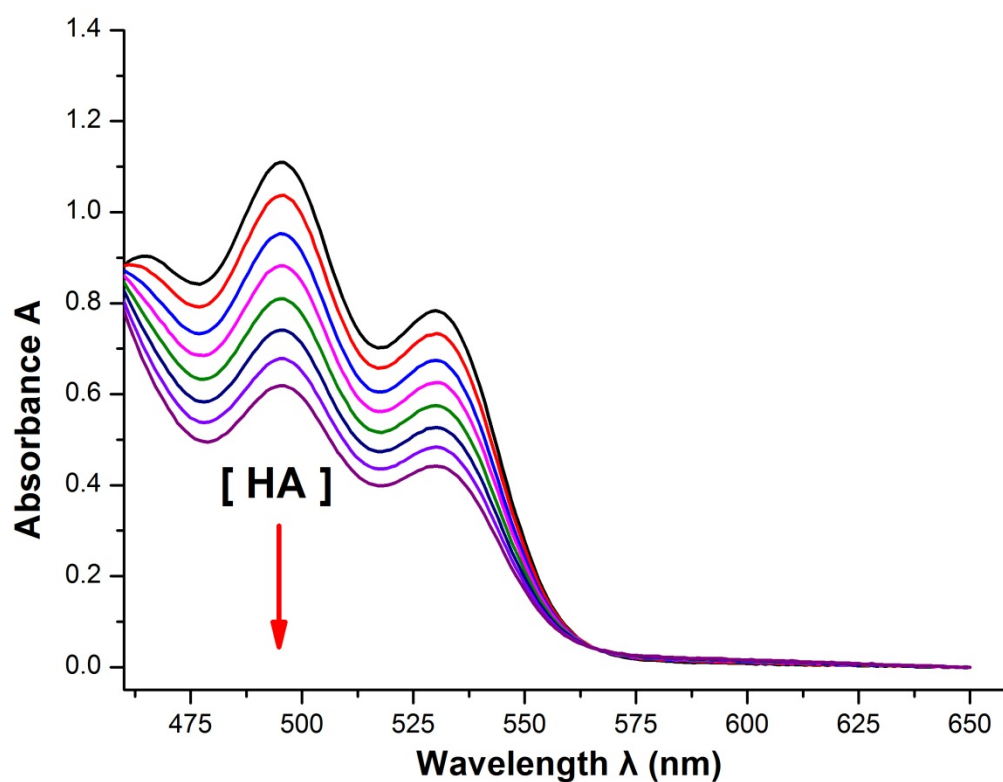

(b),

**Figure 7.** (a) Absorption spectra of the anion derived from **2-Br-9-Ph-FH** for various added amount of **2-Br-9-Ph-FH** during the titration. (b) Absorption spectra of the anion derived from **2-Br-9-Ph-FH** for various added amount of catalyst **7** during the titration.



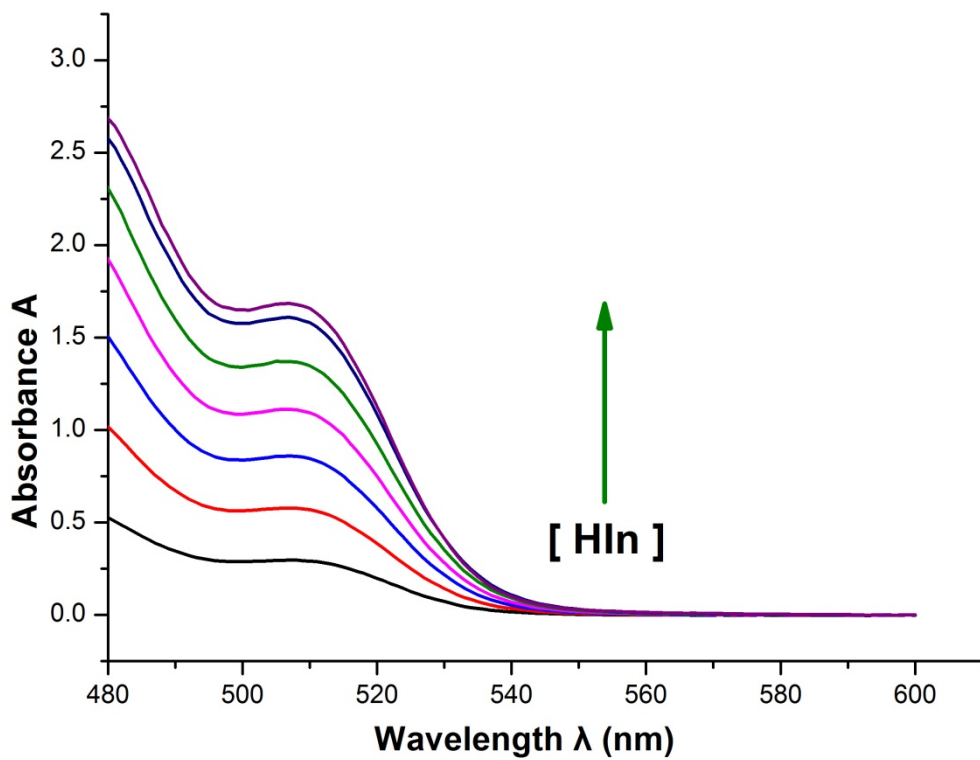

(a),

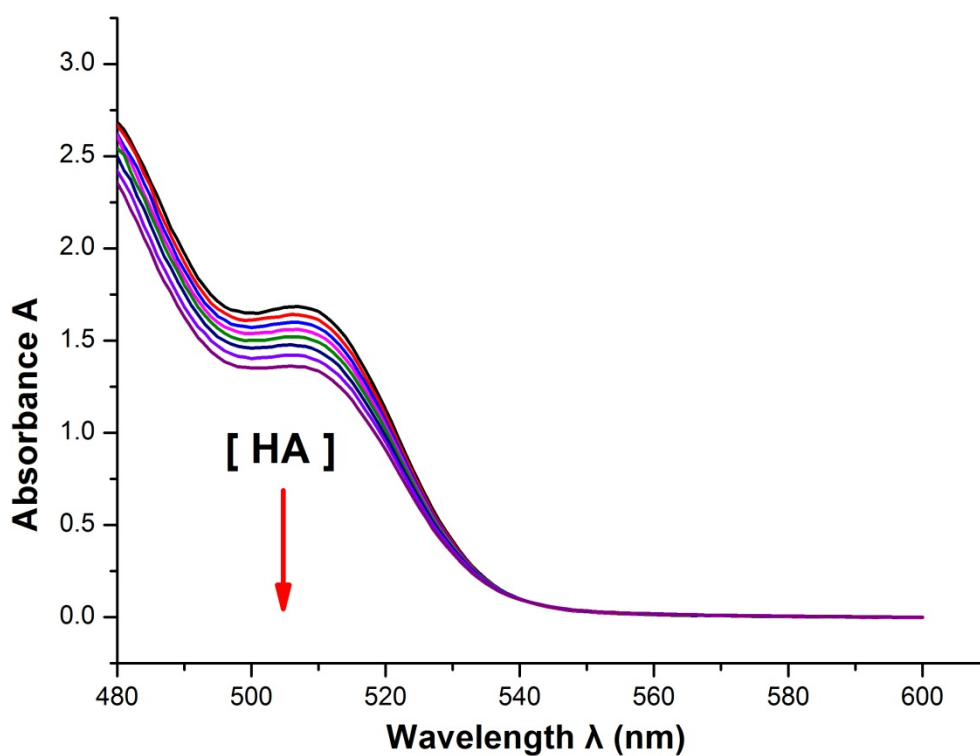

(b),

**Figure 8.** (a) Absorption spectra of the anion derived from 9-(3-Cl-Ph)-FH for various added amount of 9-(3-Cl-Ph)-FH during the titration. (b) Absorption spectra of the anion derived from 9-(3-Cl-Ph)-FH for various added amount of catalyst 8 during the titration.

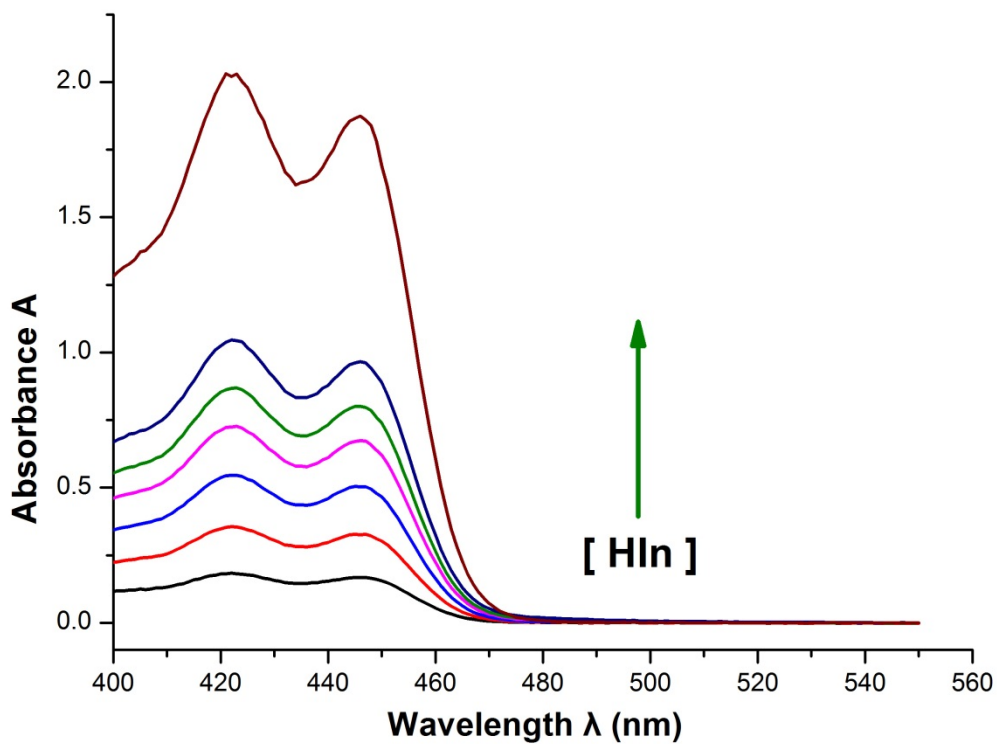

(a),

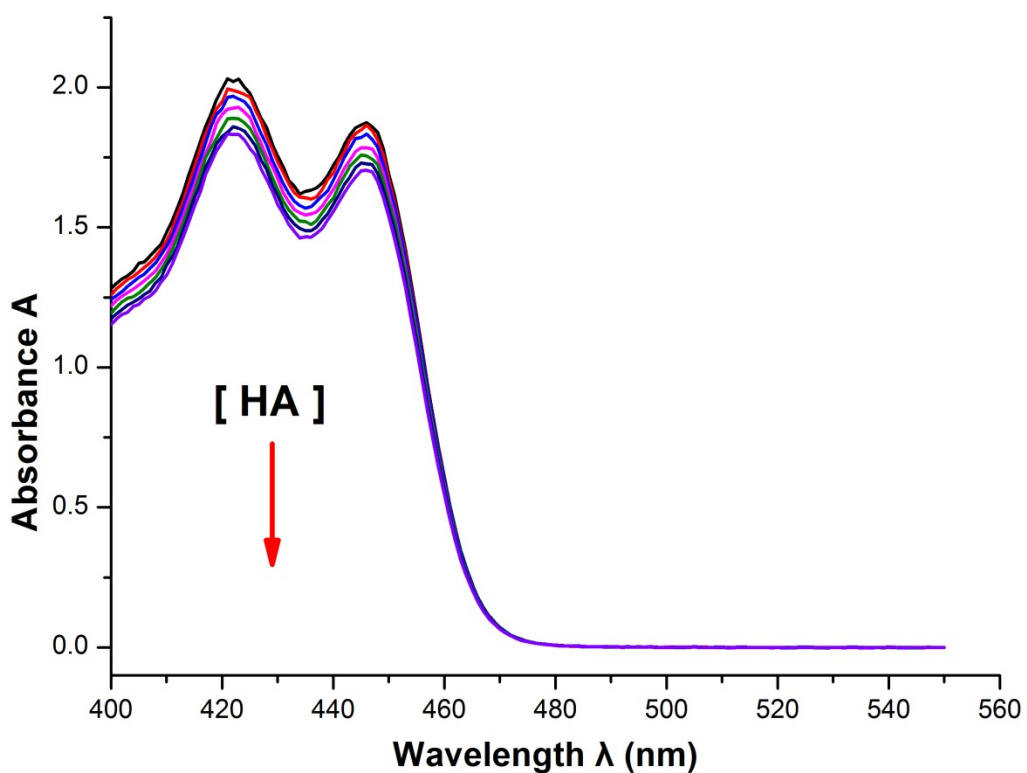

(b),

**Figure 9.** (a) Absorption spectra of the anion derived from 9-CN-FH for various added amount of 9-CN-FH during the titration. (b) Absorption spectra of the anion derived from 9-CN-FH for various added amount of catalyst 9 during the titration.

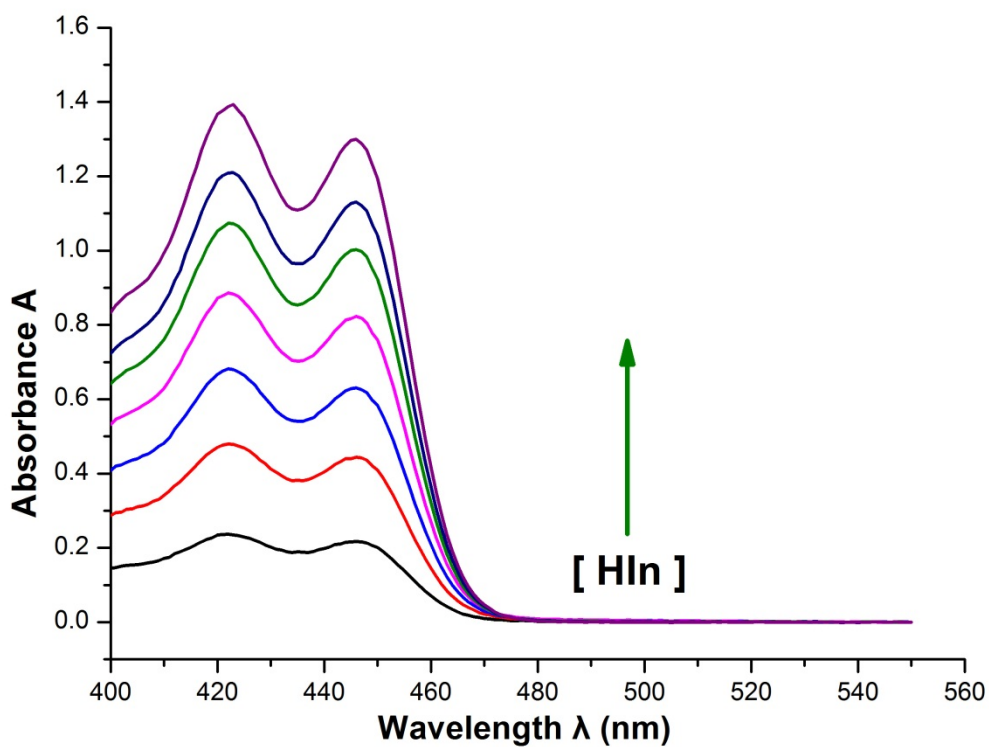

(a),

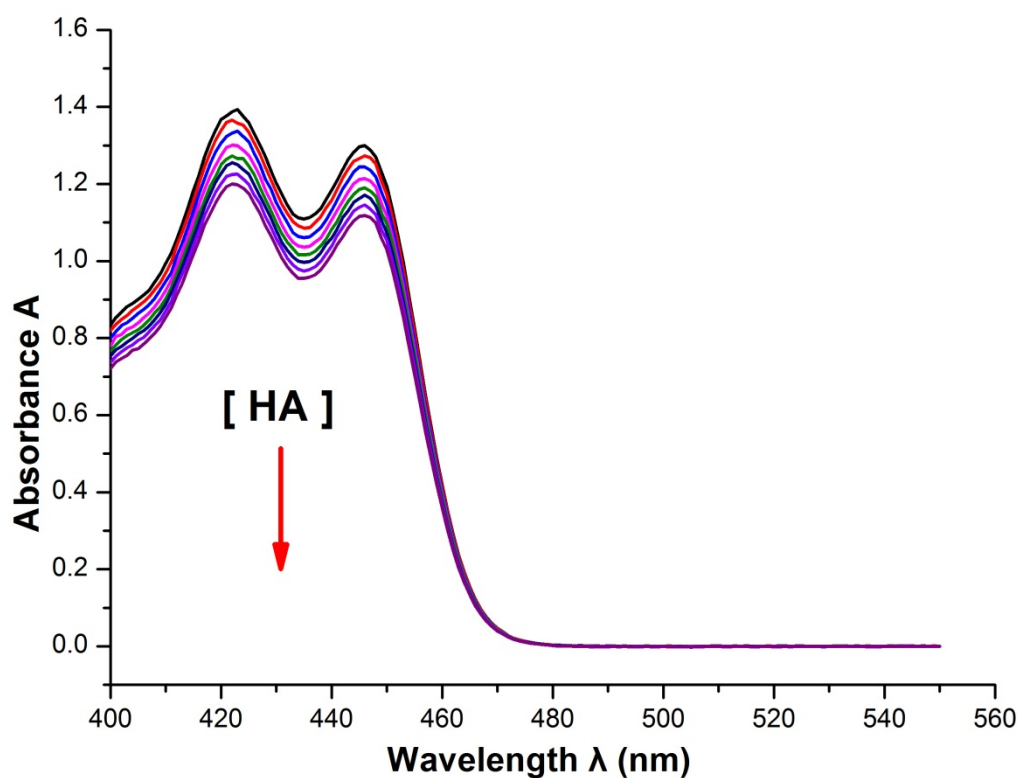

(b),

**Figure 10.** (a) Absorption spectra of the anion derived from **9-CN-FH** for various added amount of **9-CN-FH** during the titration. (b) Absorption spectra of the anion derived from **9-CN-FH** for various added amount of catalyst **10** during the titration.

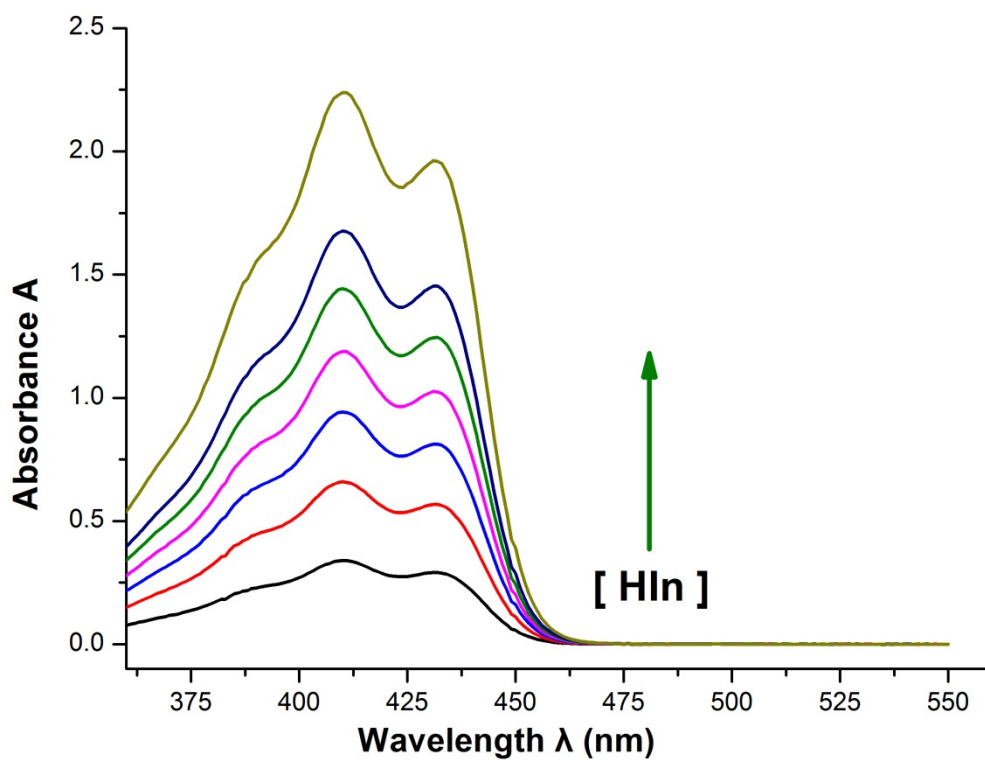

(a),

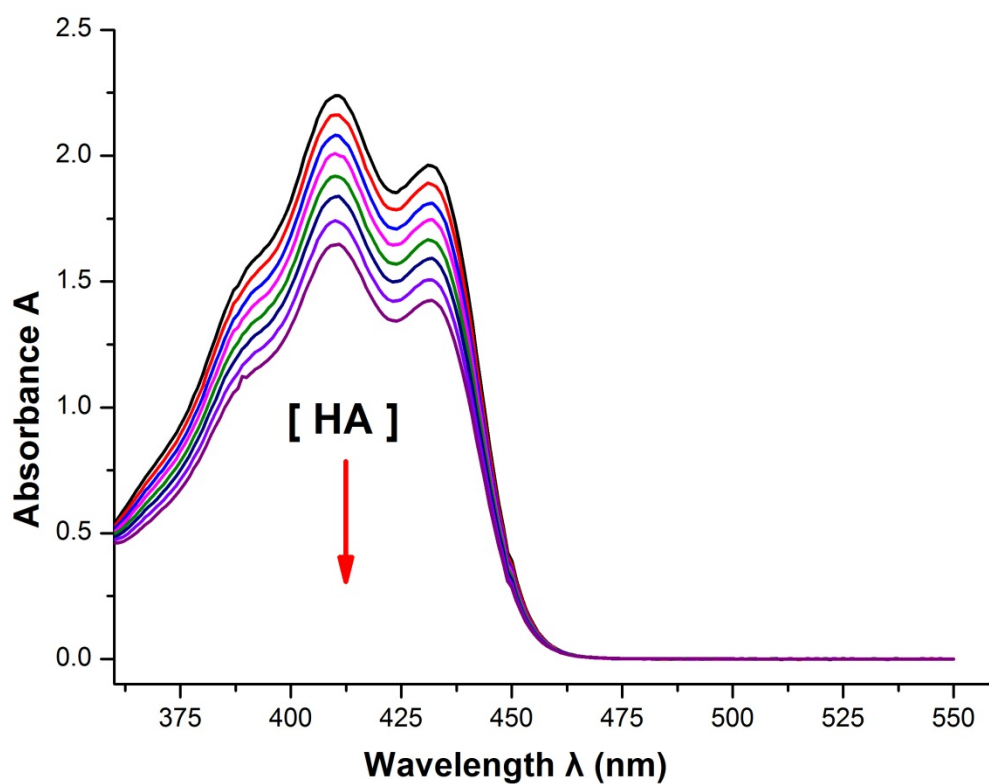

(b),

**Figure 11.** (a) Absorption spectra of the anion derived from 9-CO<sub>2</sub>Me-FH for various added amount of 9-CO<sub>2</sub>Me-FH during the titration. (b) Absorption spectra of the anion derived from 9-CO<sub>2</sub>Me-FH for various added amount of catalyst 11 during the titration.

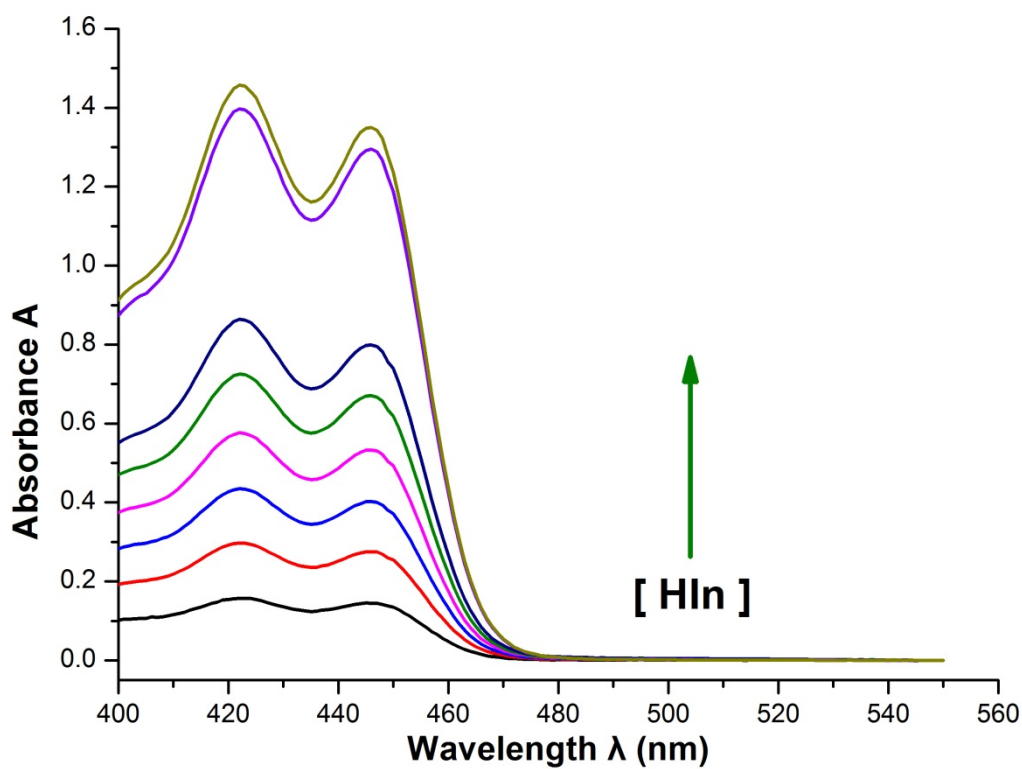

(a),

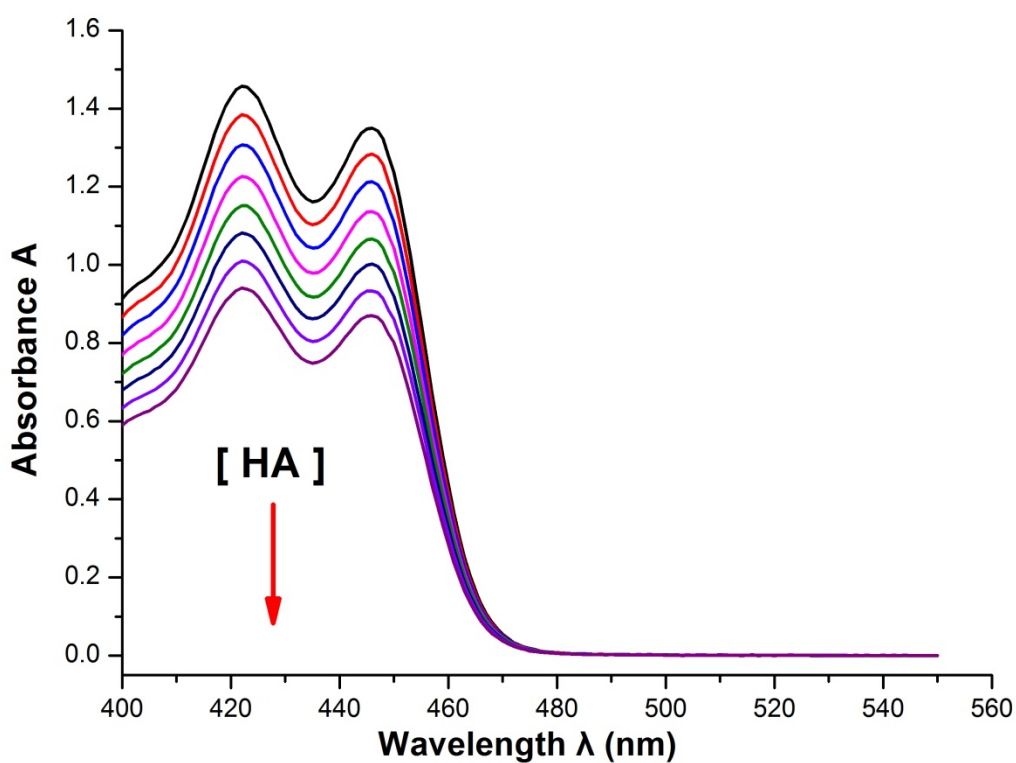

(b),

**Figure 12.** (a) Absorption spectra of the anion derived from 9-CN-FH for various added amount of 9-CN-FH during the titration. (b) Absorption spectra of the anion derived from 9-CN-FH for various added amount of catalyst 12 during the titration.

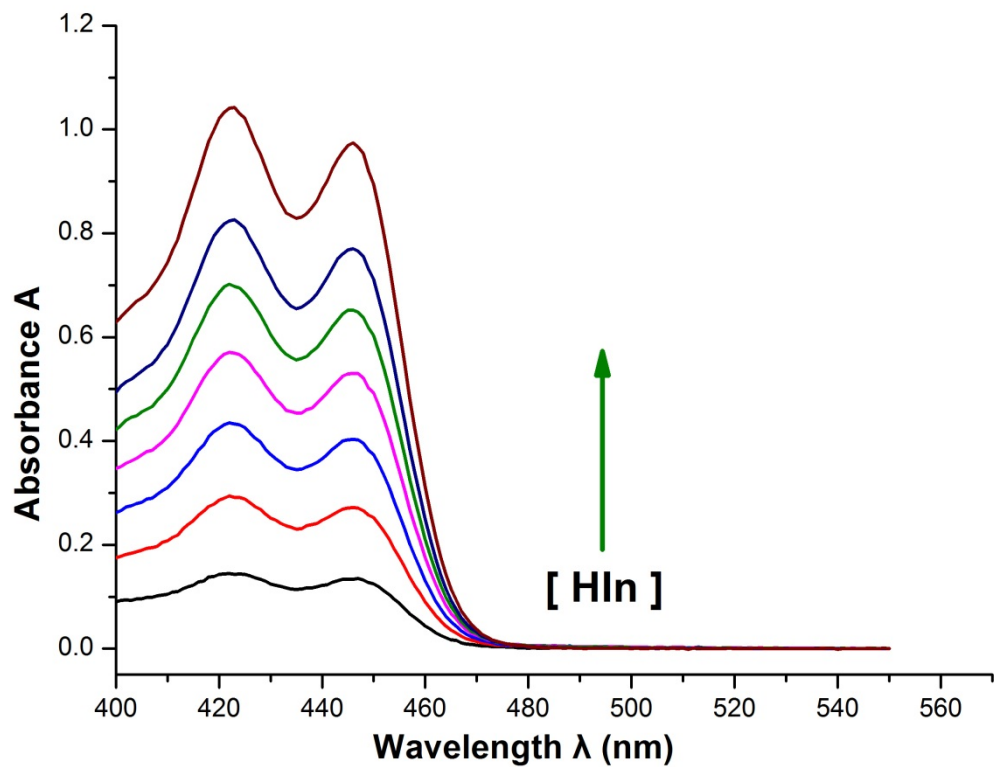

(a),

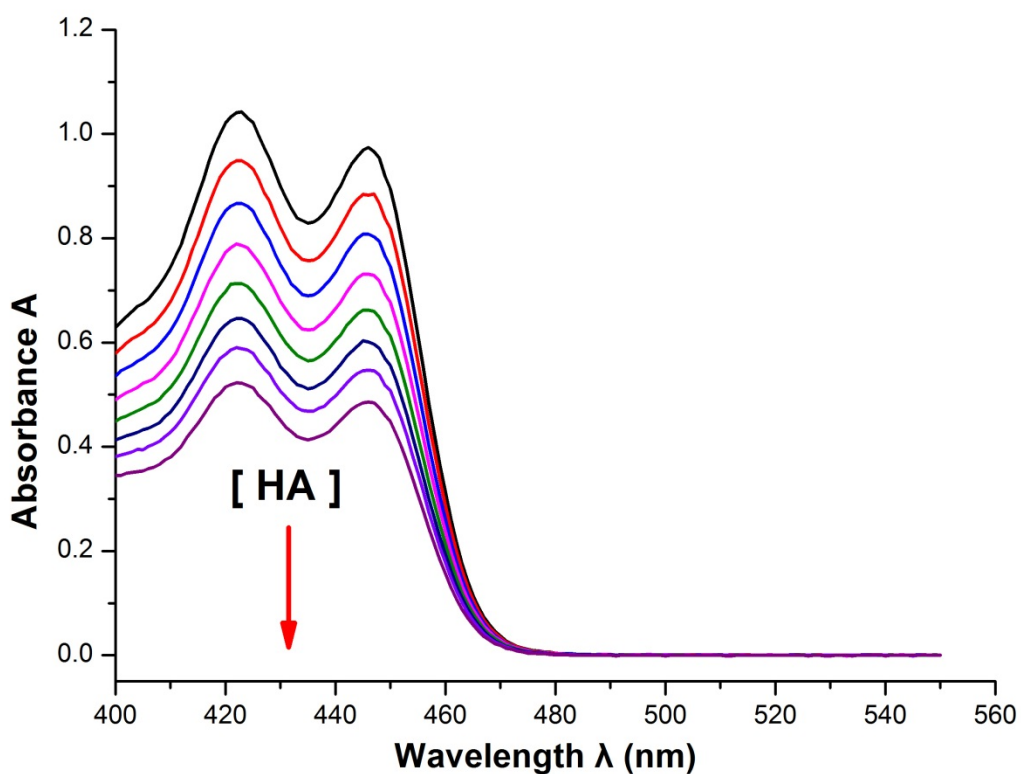

(b),

**Figure 13.** (a) Absorption spectra of the anion derived from **9-CN-FH** for various added amount of **9-CN-FH** during the titration. (b) Absorption spectra of the anion derived from **9-CN-FH** for various added amount of catalyst **13** during the titration.

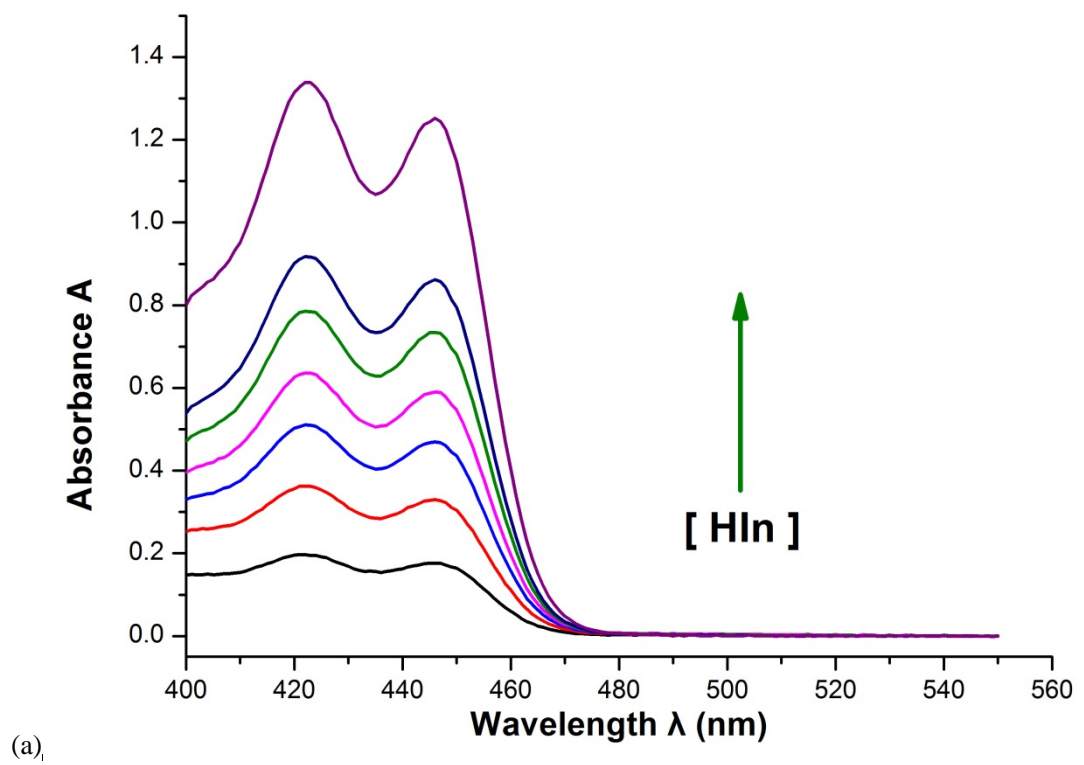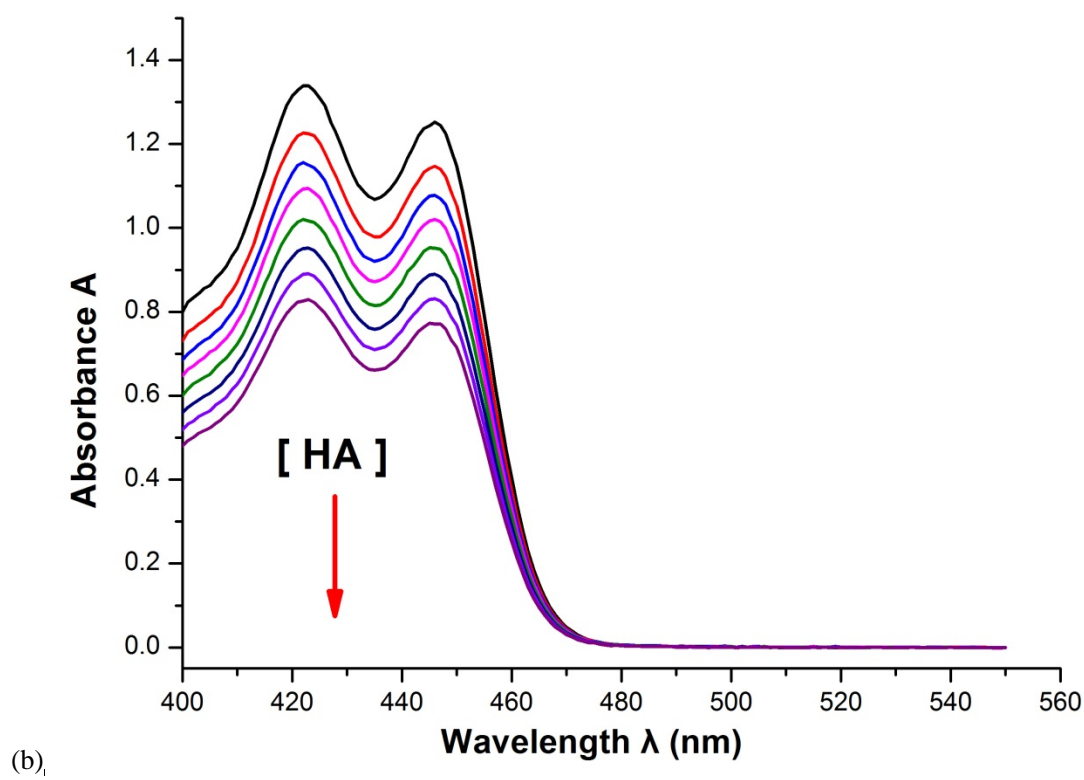

**Figure 14.** (a) Absorption spectra of the anion derived from 9-CN-FH for various added amount of 9-CN-FH during the titration. (b) Absorption spectra of the anion derived from 9-CN-FH for various added amount of catalyst 15 during the titration.



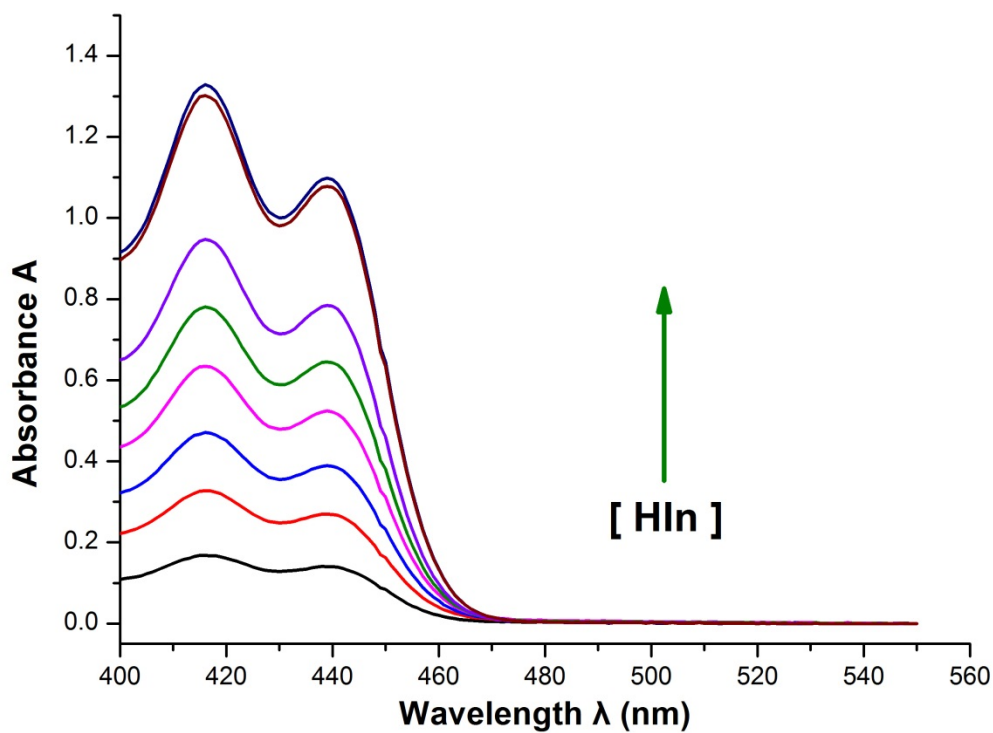

(a),

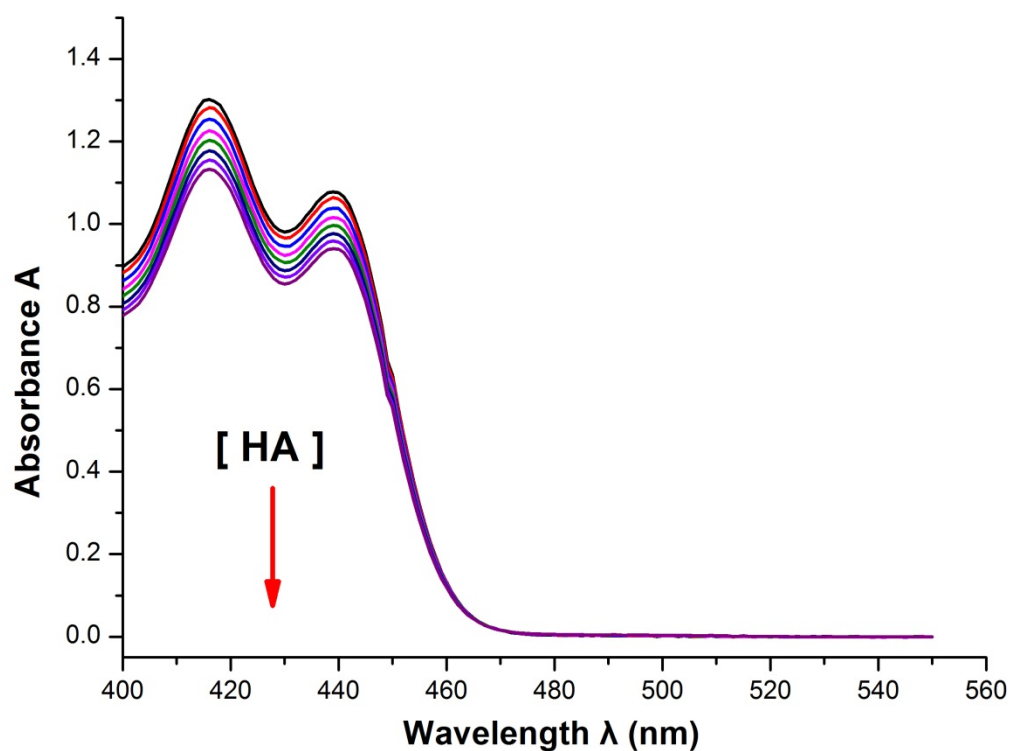

(b),

**Figure 15.** (a) Absorption spectra of the anion derived from **2,7-diBr-9-CO<sub>2</sub>Me-FH** for various added amount of **2,7-diBr-9-CO<sub>2</sub>Me-FH** during the titration. (b) Absorption spectra of the anion derived from **2,7-diBr-9-CO<sub>2</sub>Me-FH** for various added amount of catalyst **16** during the titration.



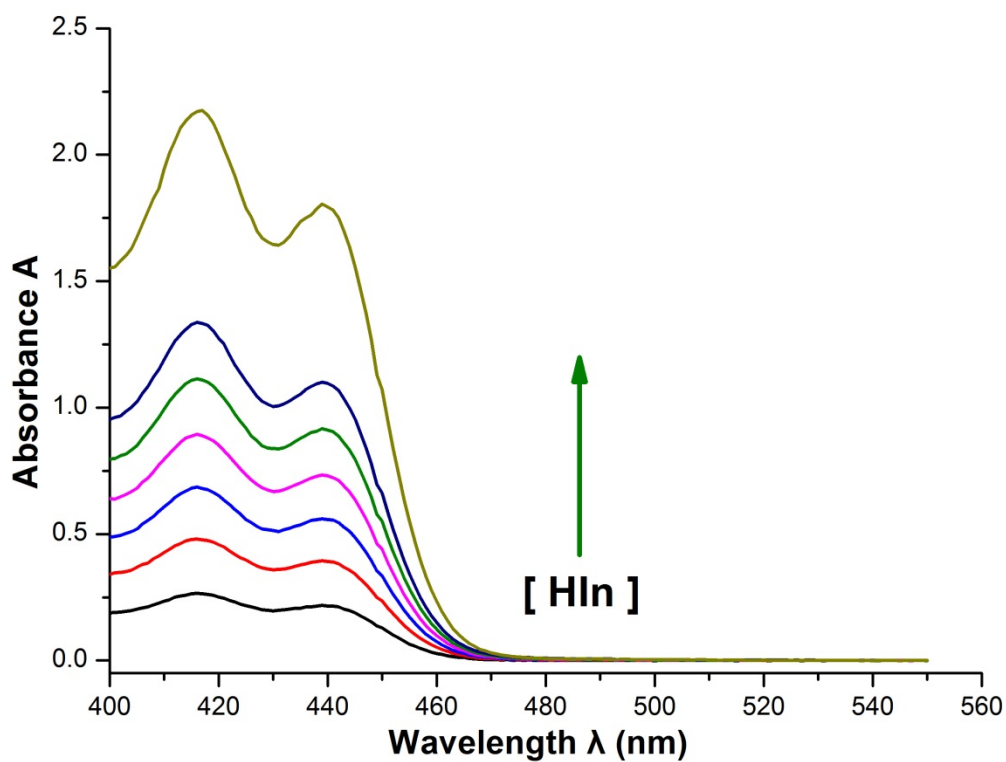

(a)

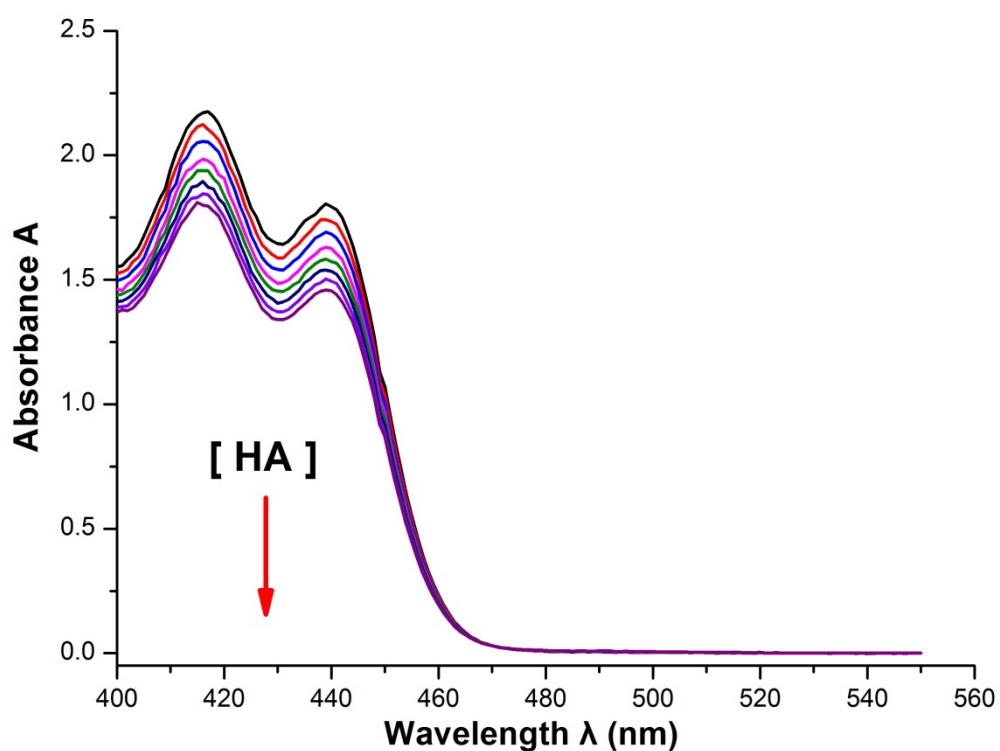

(b)

**Figure 16.** (a) Absorption spectra of the anion derived from **2,7-diBr-9-CO<sub>2</sub>Me-FH** for various added amount of **2,7-diBr-9-CO<sub>2</sub>Me-FH** during the titration. (b) Absorption spectra of the anion derived from **2,7-diBr-9-CO<sub>2</sub>Me-FH** for various added amount of catalyst **17** during the titration.

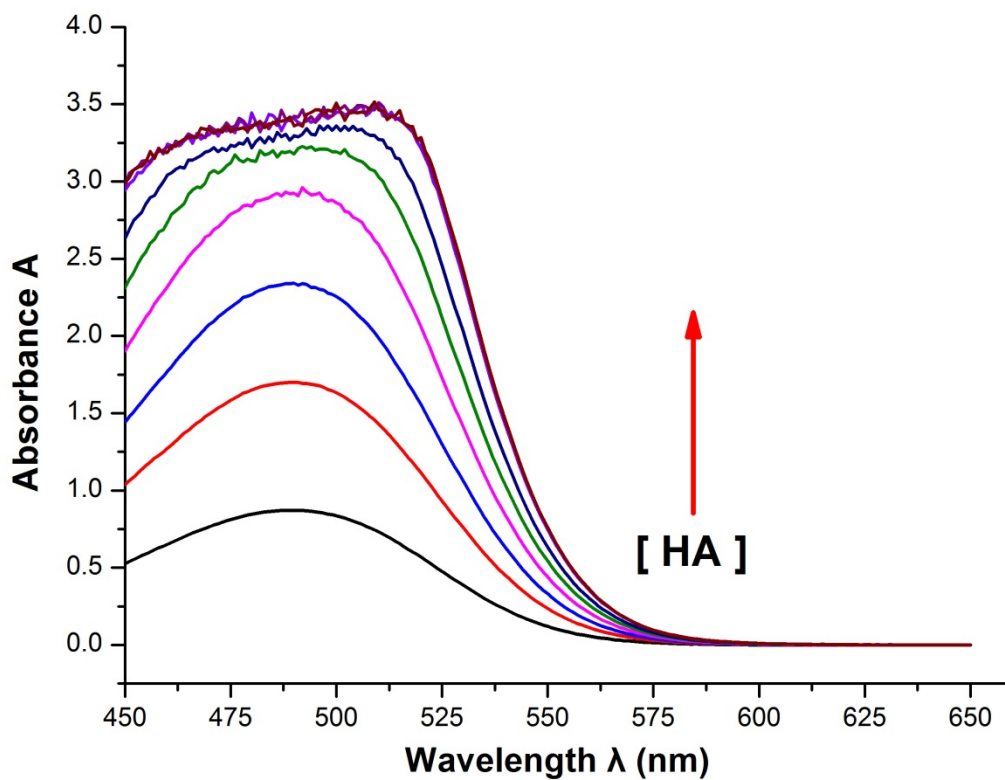

(a),

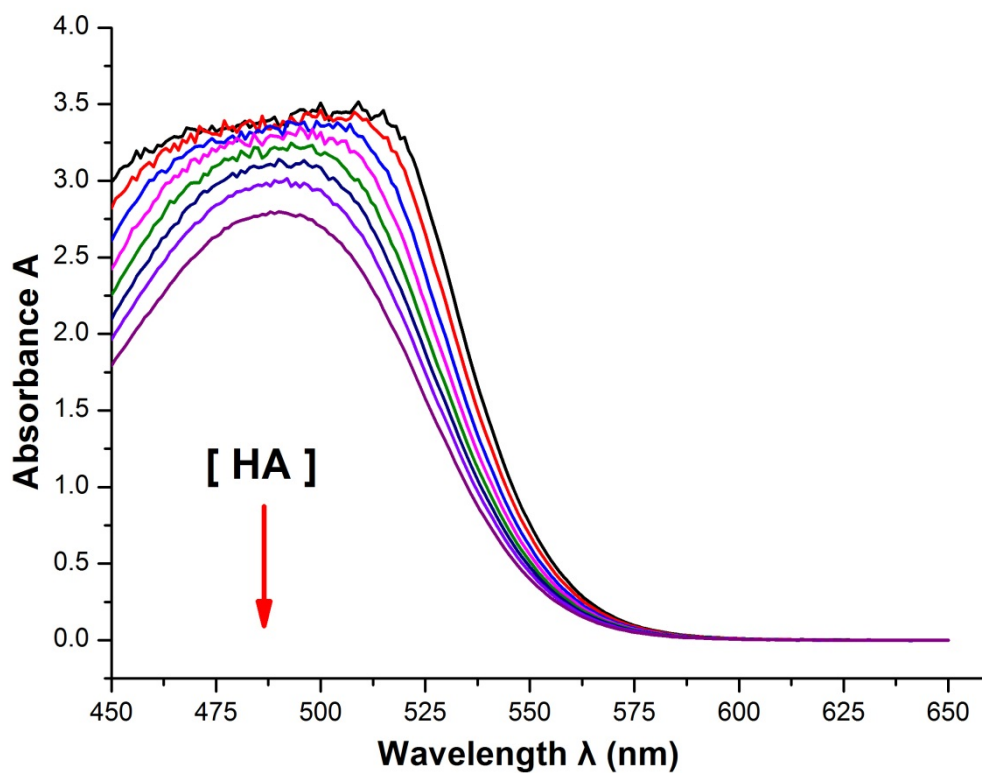

(b),

**Figure 17.** (a) Absorption spectra of the anion derived from catalyst **18** for various added amount of catalyst **18** during the titration. (b) Absorption spectra of the anion derived from catalyst **18** for various added amount of carbazole during the titration.

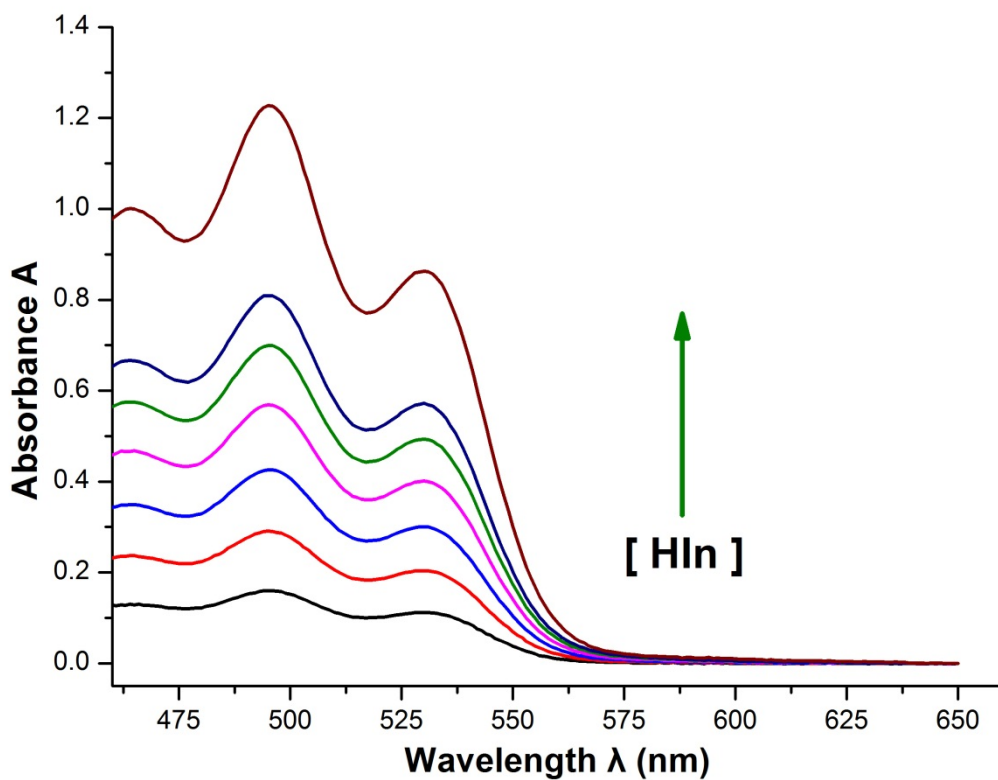

(a),

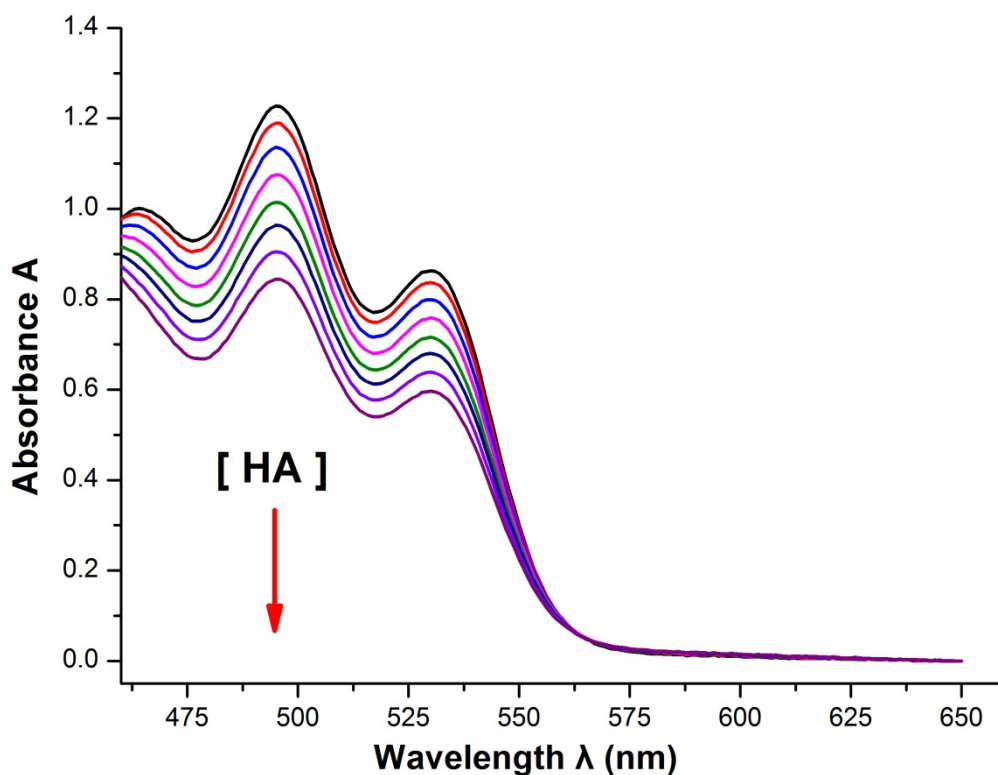

(b),

**Figure 18.** (a) Absorption spectra of the anion derived from **2-Br-9-Ph-FH** for various added amount of **2-Br-9-Ph-FH** during the titration. (b) Absorption spectra of the anion derived from **2-Br-9-Ph-FH** for various added amount of catalyst **19** during the titration.

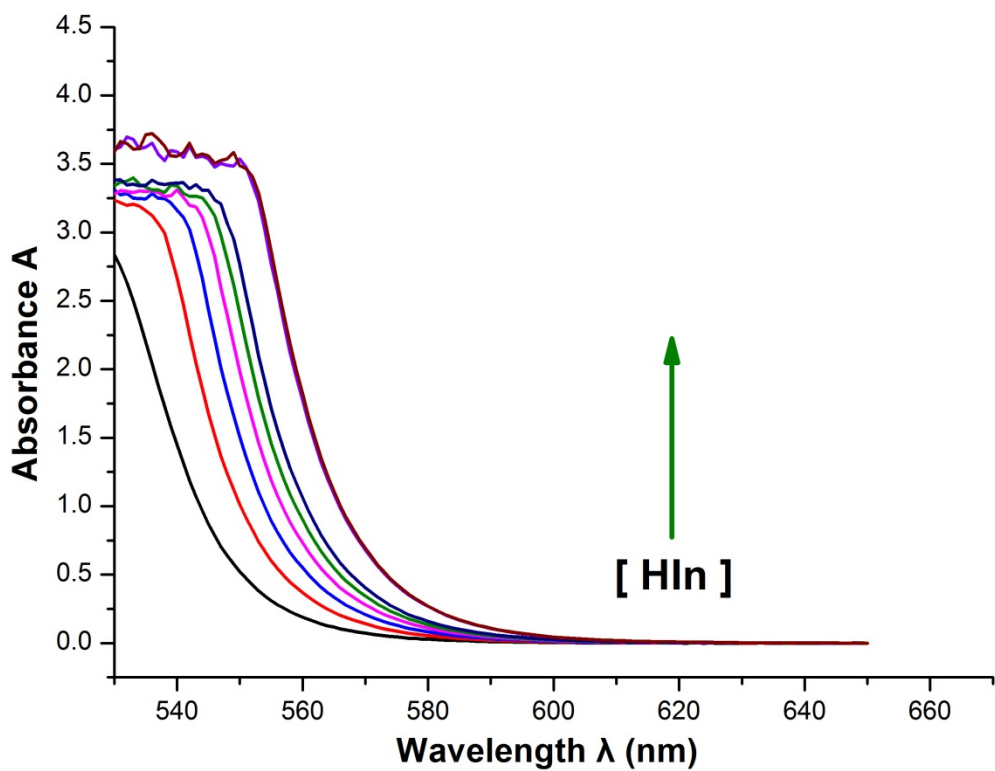

(a)

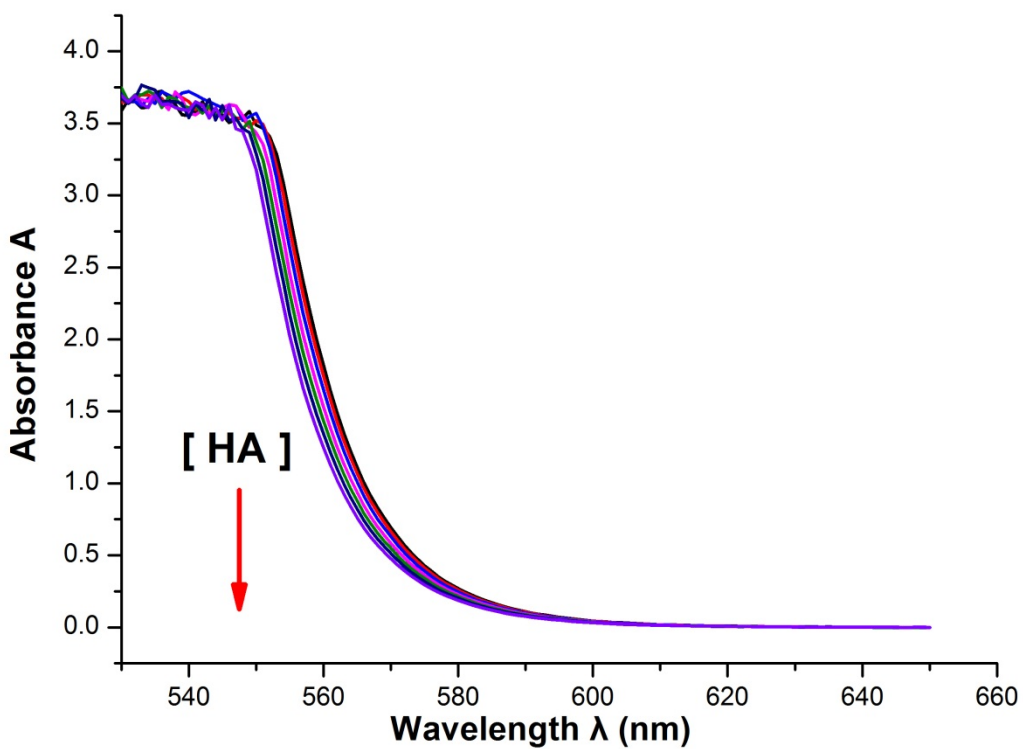

(b)

**Figure 19.** (a) Absorption spectra of the anion derived from **Fluorenone phenylhydrazone** for various added amount of **Fluorenone phenylhydrazone** during the titration. (b) Absorption spectra of the anion derived from **Fluorenone phenylhydrazone** for various added amount of catalyst **20** during the titration.

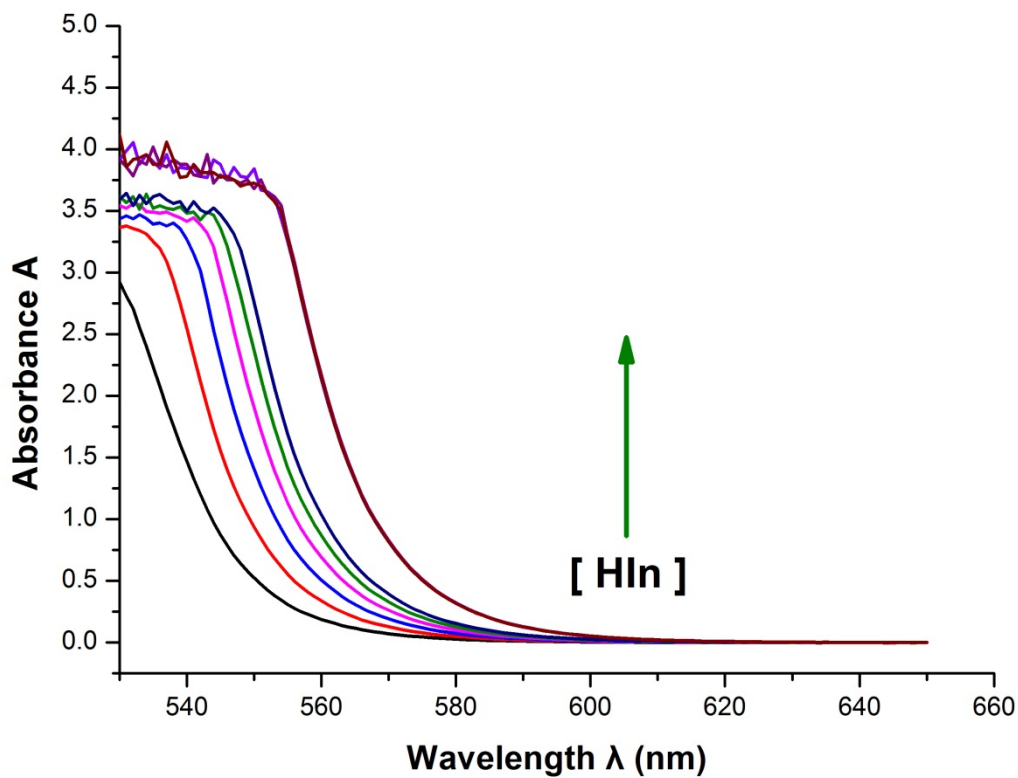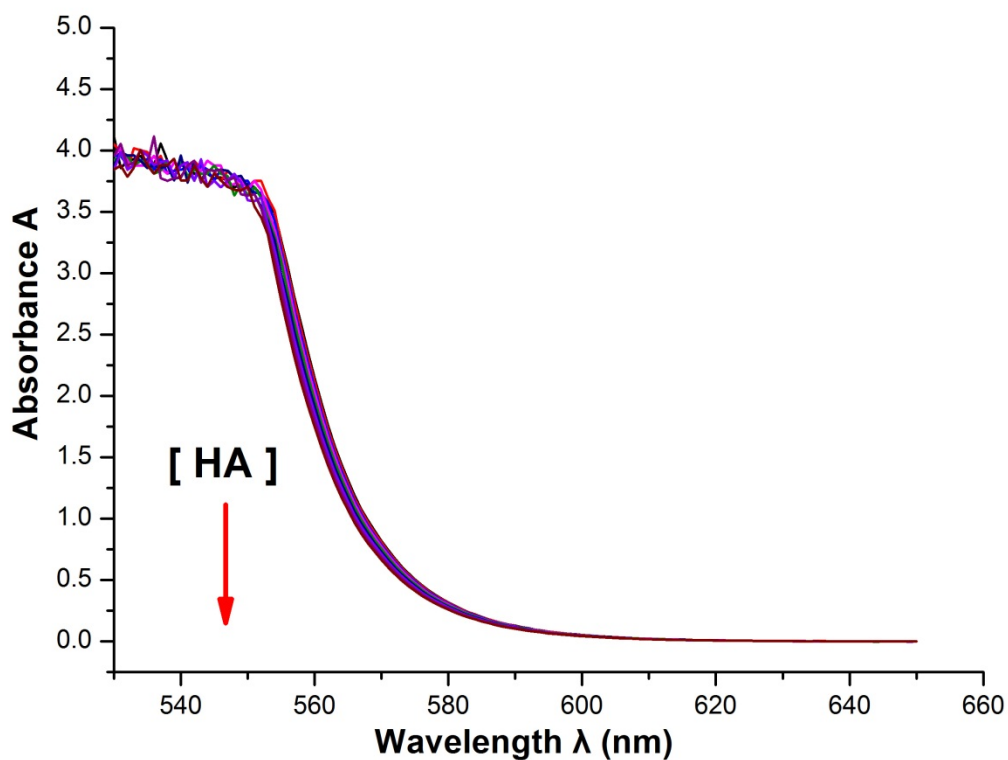

**Figure 20.** (a) Absorption spectra of the anion derived from **Fluorenone phenylhydrazone** for various added amount of **Fluorenone phenylhydrazone** during the titration. (b) Absorption spectra of the anion derived from **Fluorenone phenylhydrazone** for various added amount of catalyst **21** during the titration.

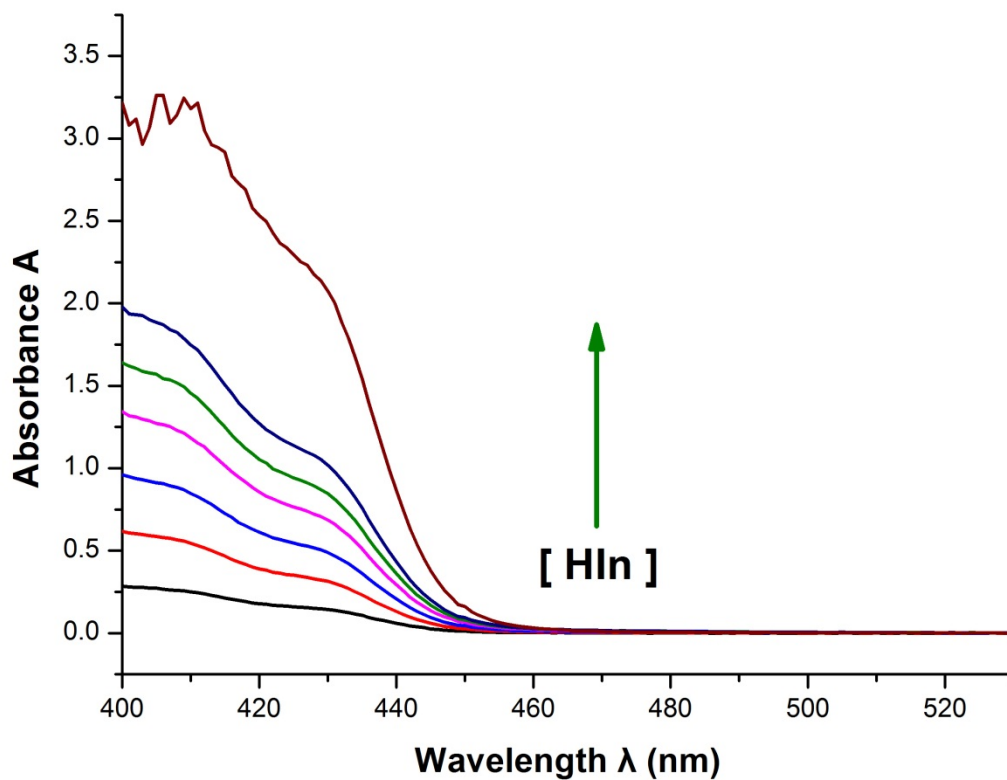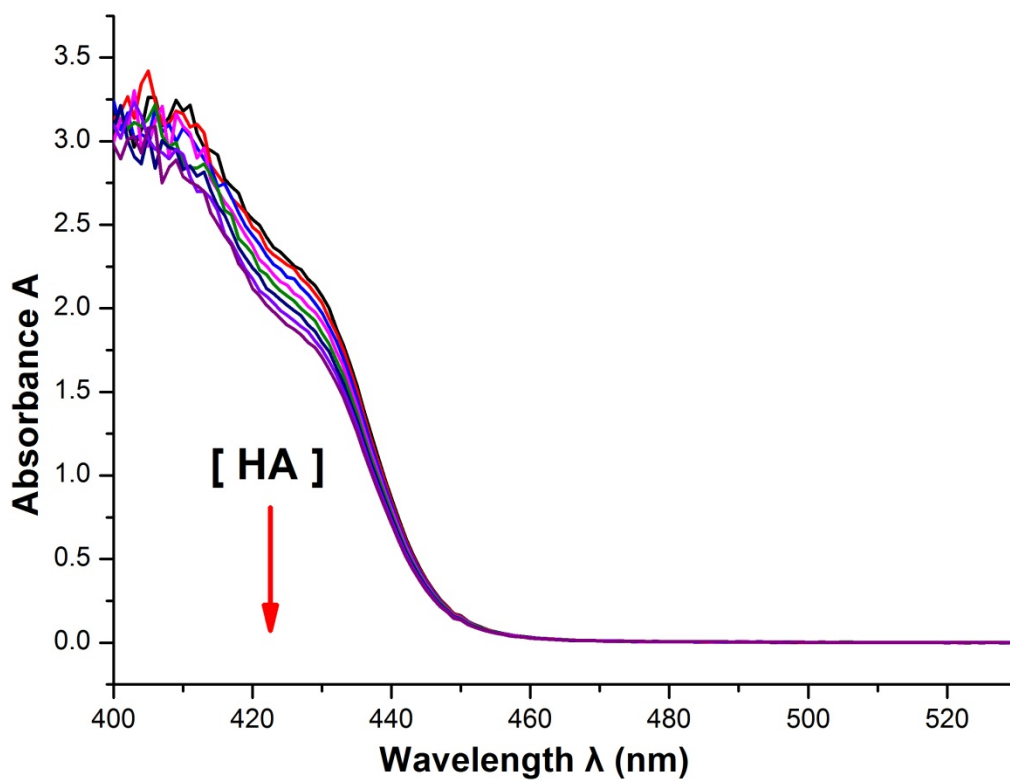

**Figure 21.** (a) Absorption spectra of the anion derived from **2-Br-9-SO<sub>2</sub>Ph-FH** for various added amount of **2-Br-9-SO<sub>2</sub>Ph-FH** during the titration. (b) Absorption spectra of the anion derived from **2-Br-9-SO<sub>2</sub>Ph-FH** for various added amount of catalyst **22** during the titration.

Copies of  $^1\text{H}$  NMR and  $^{13}\text{C}$  NMR spectra for all new catalysts:

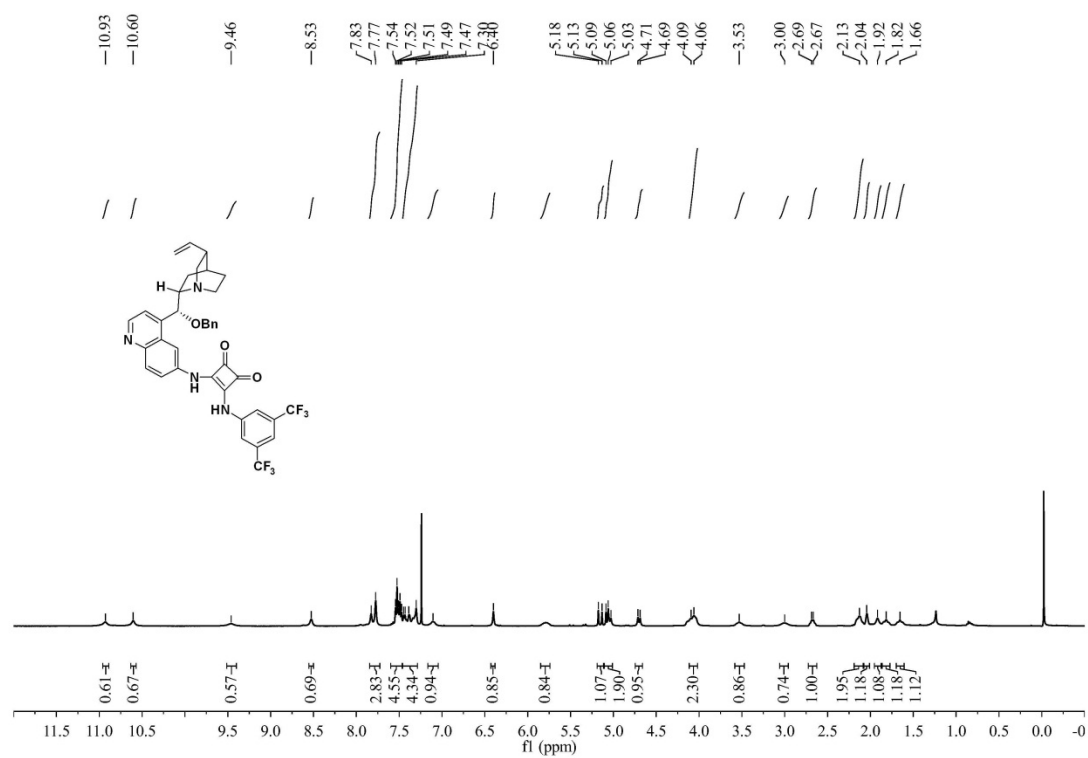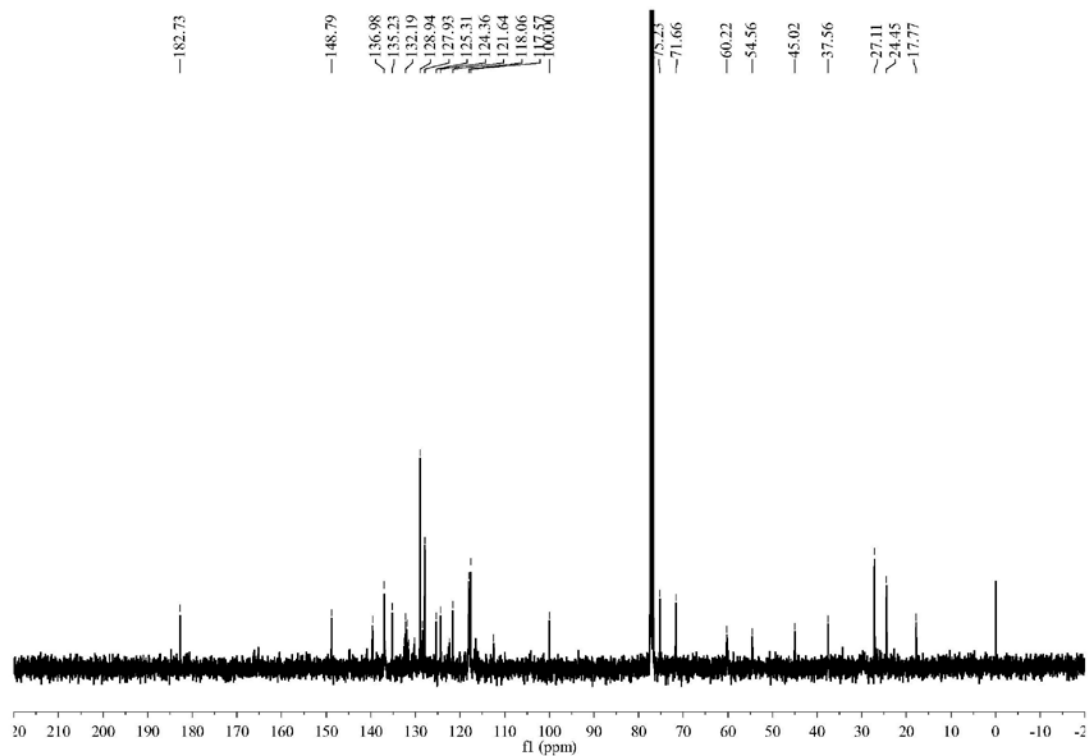

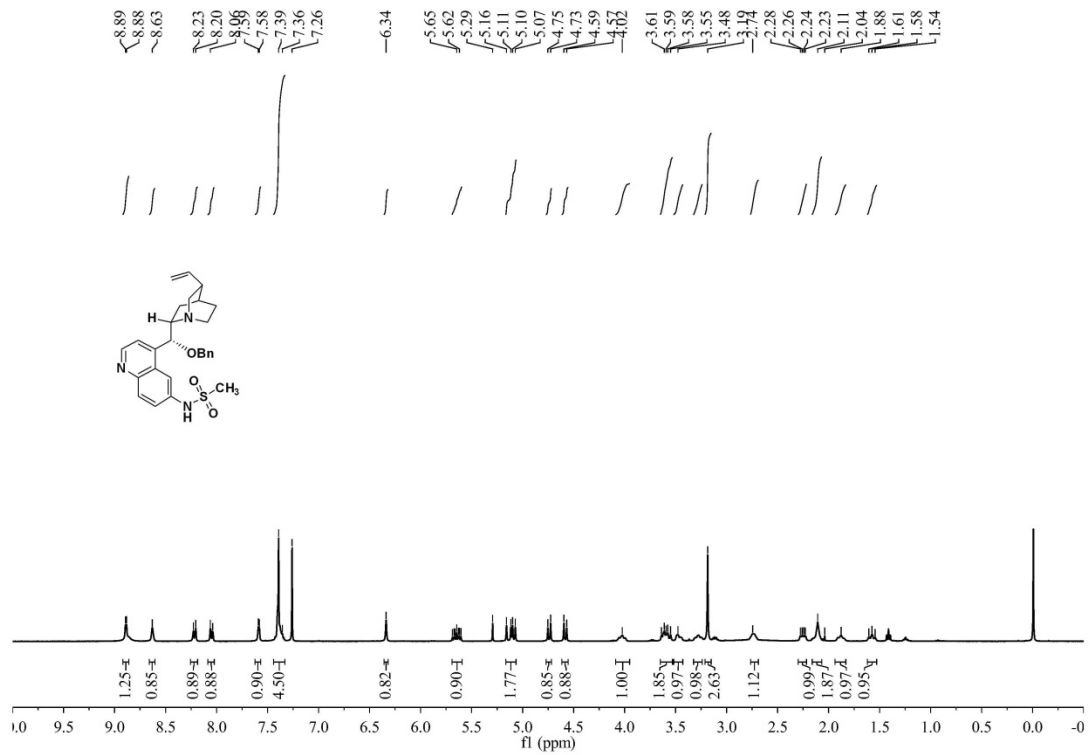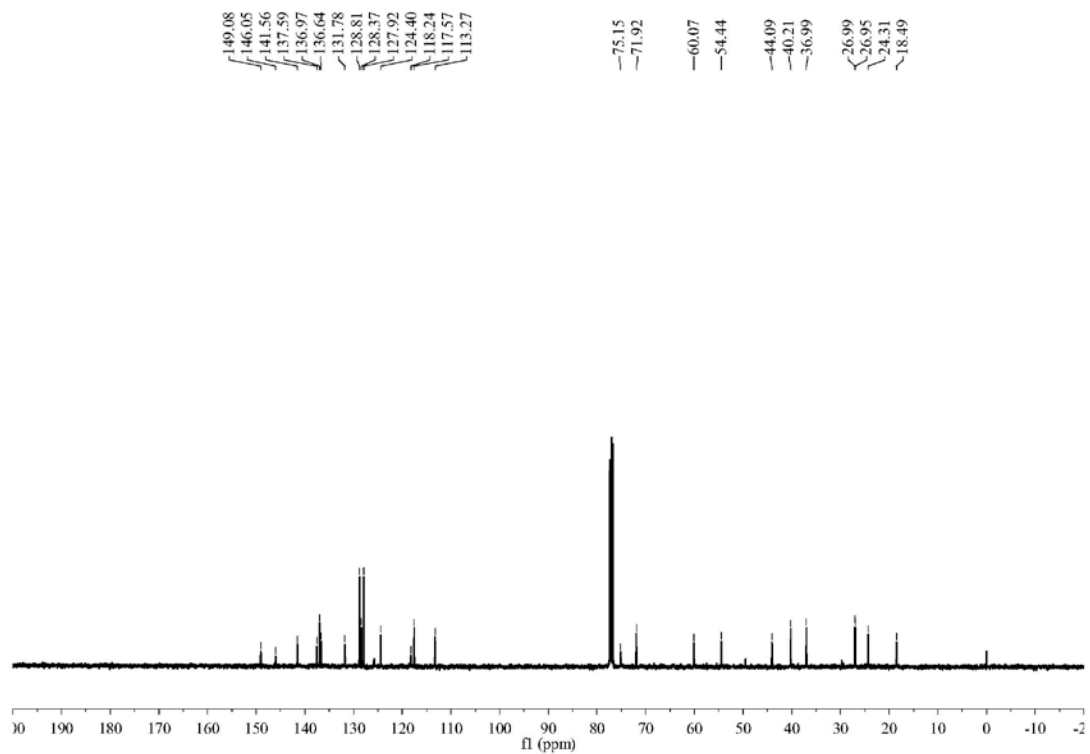



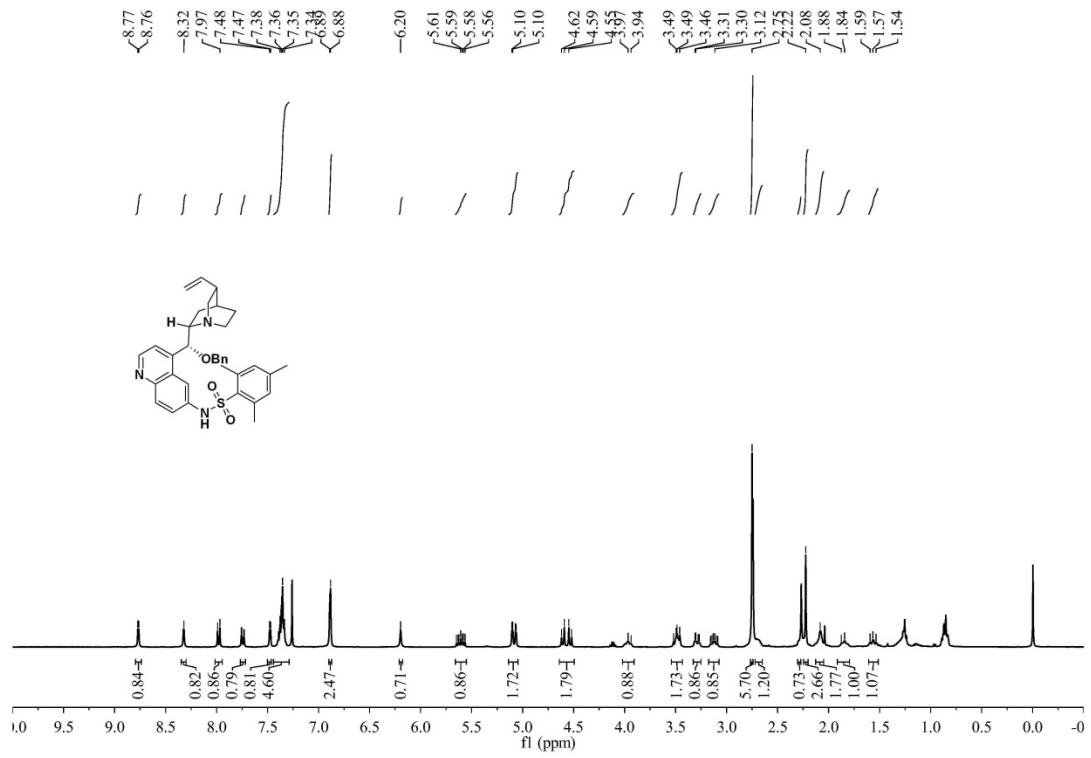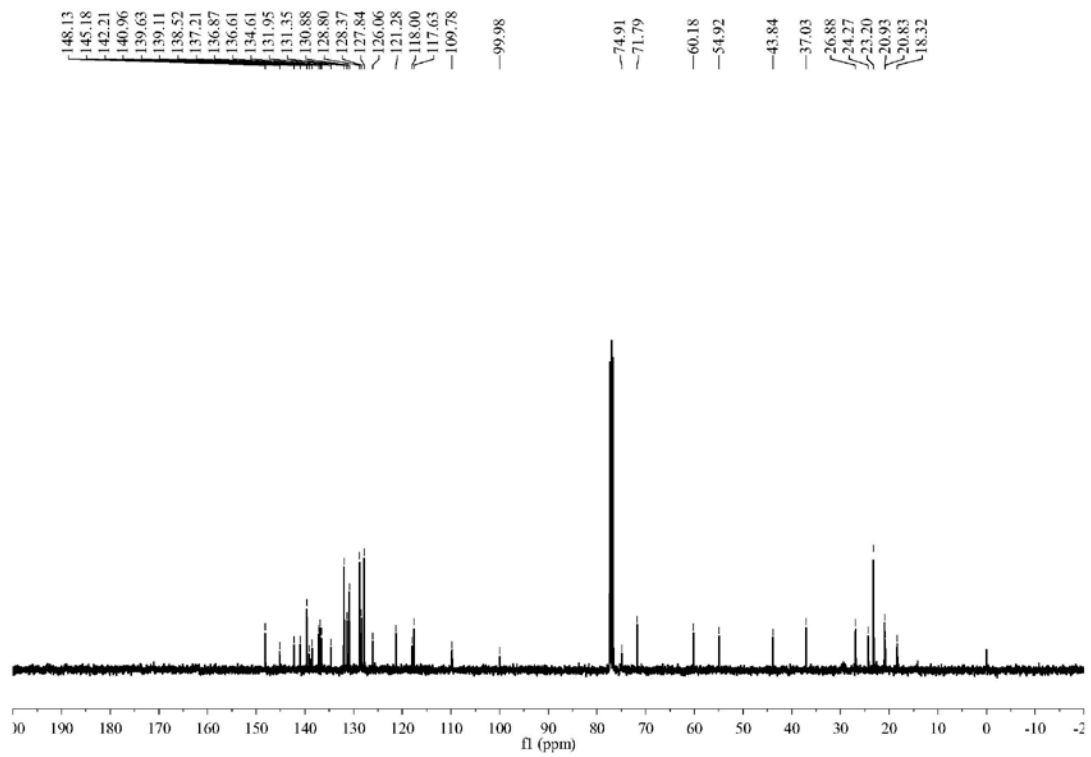

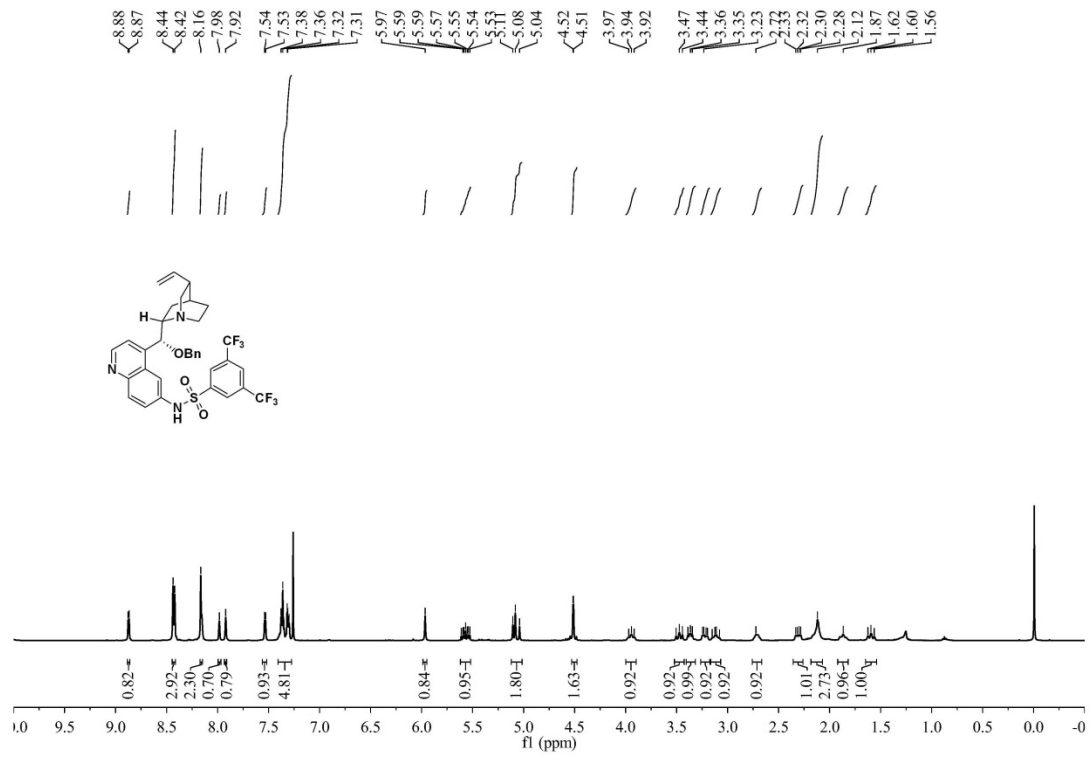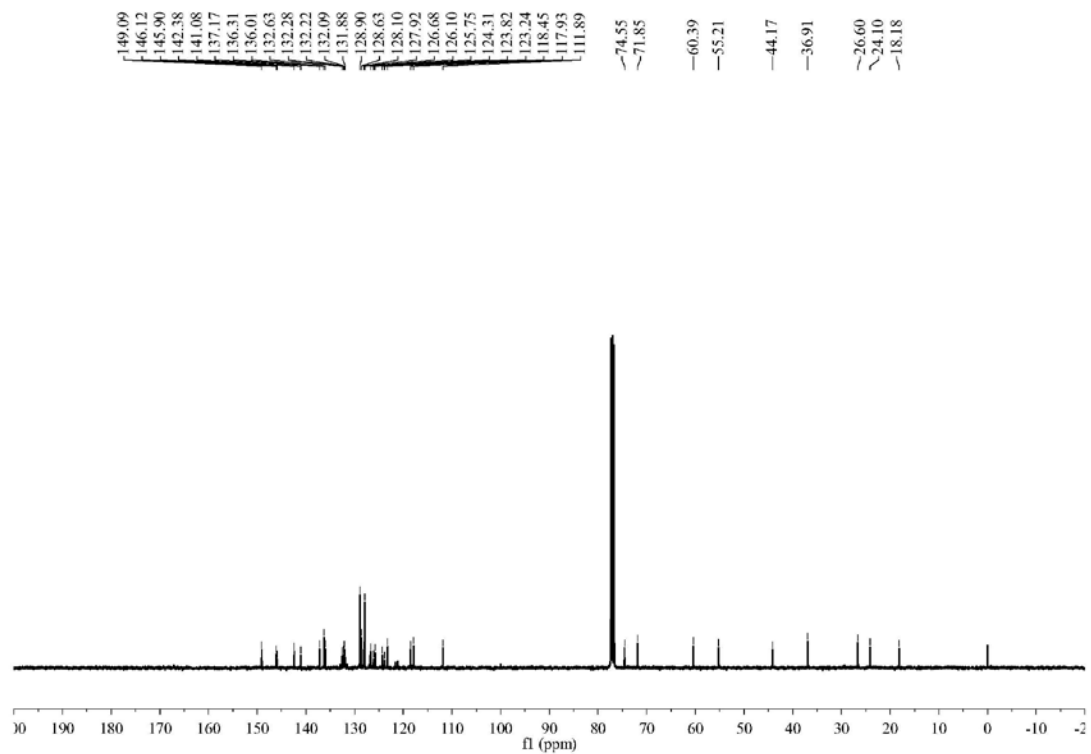

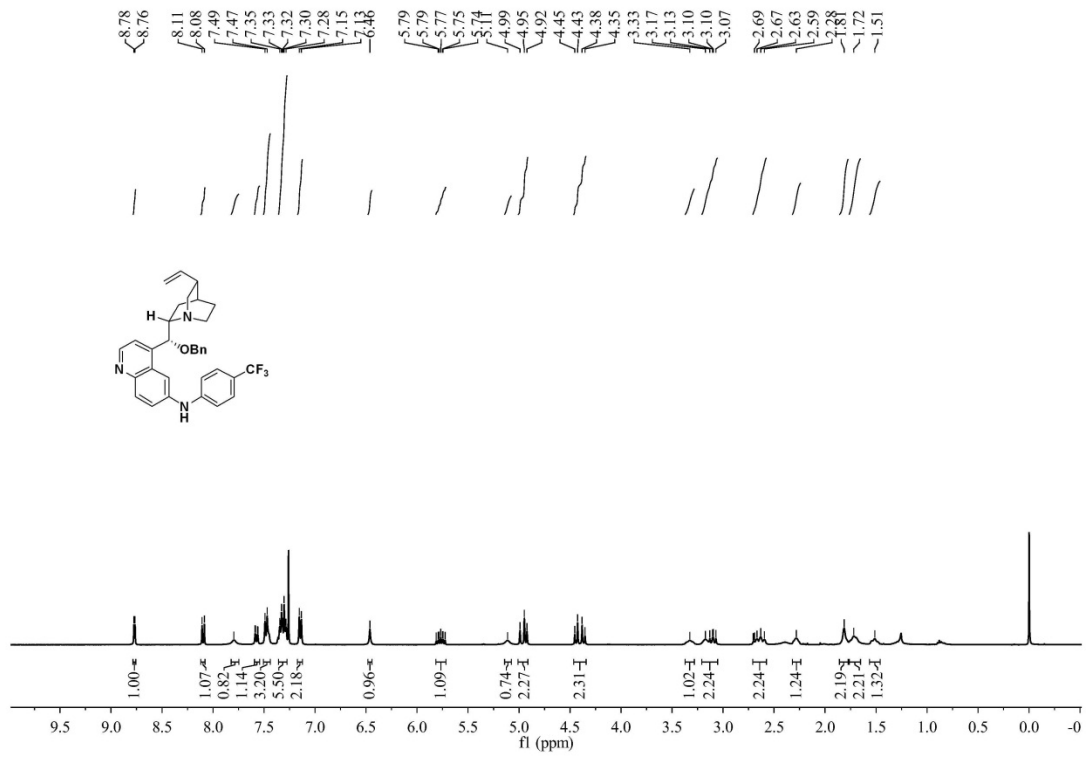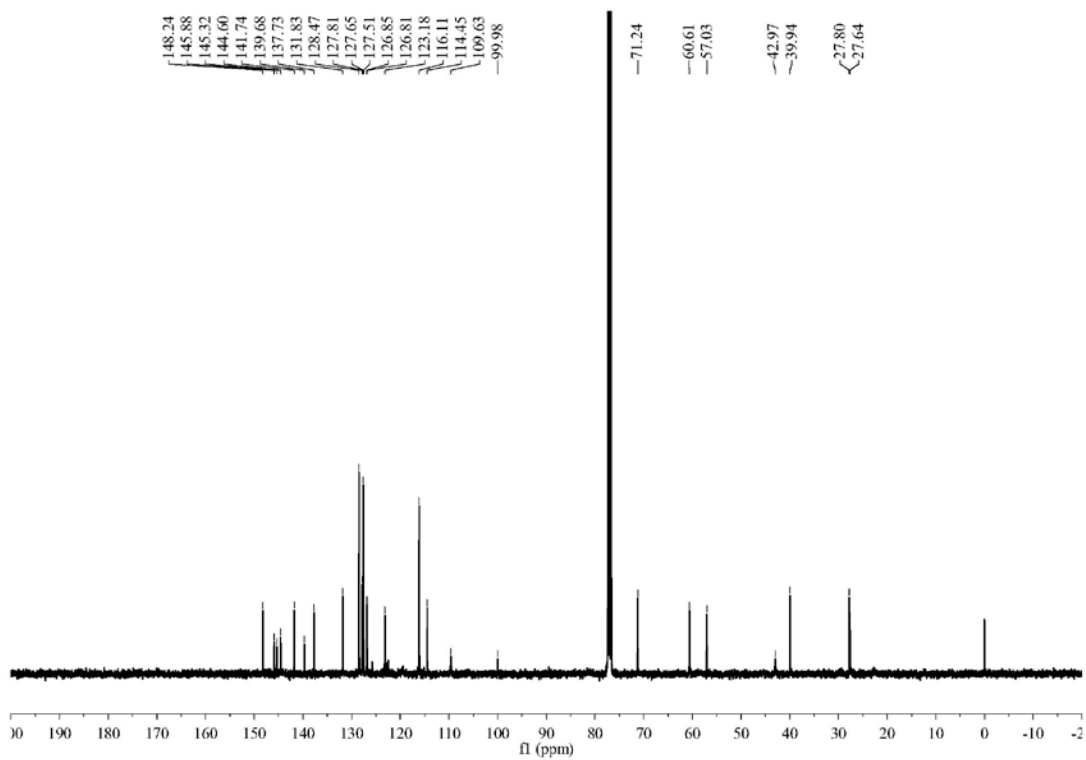

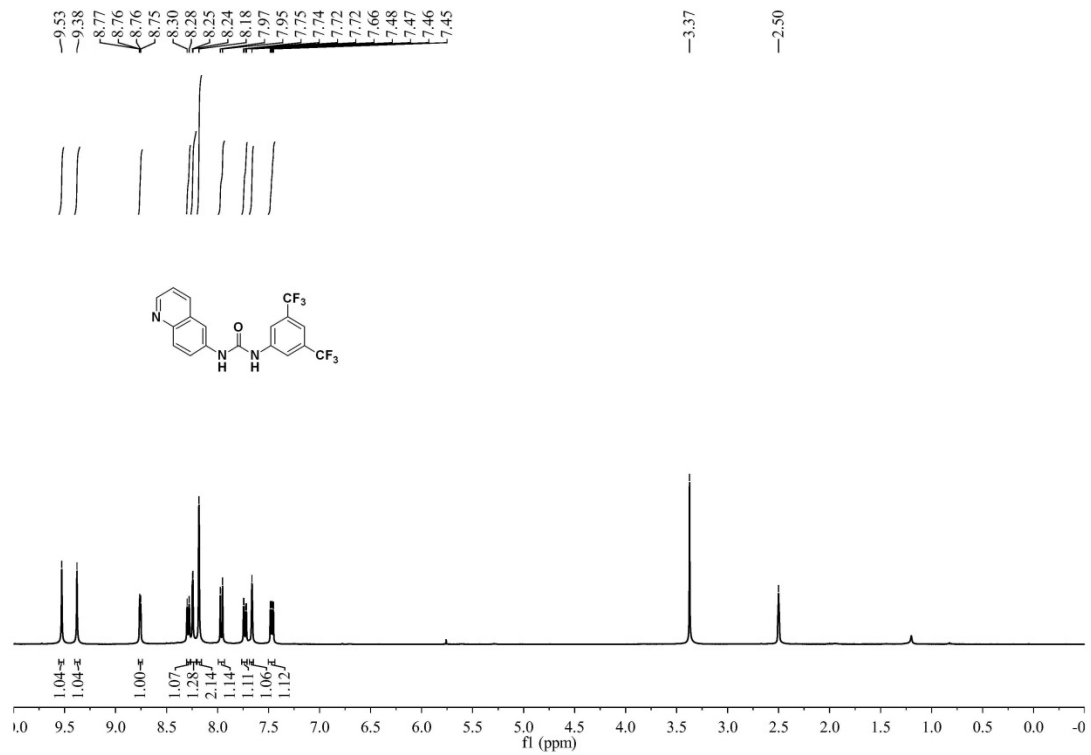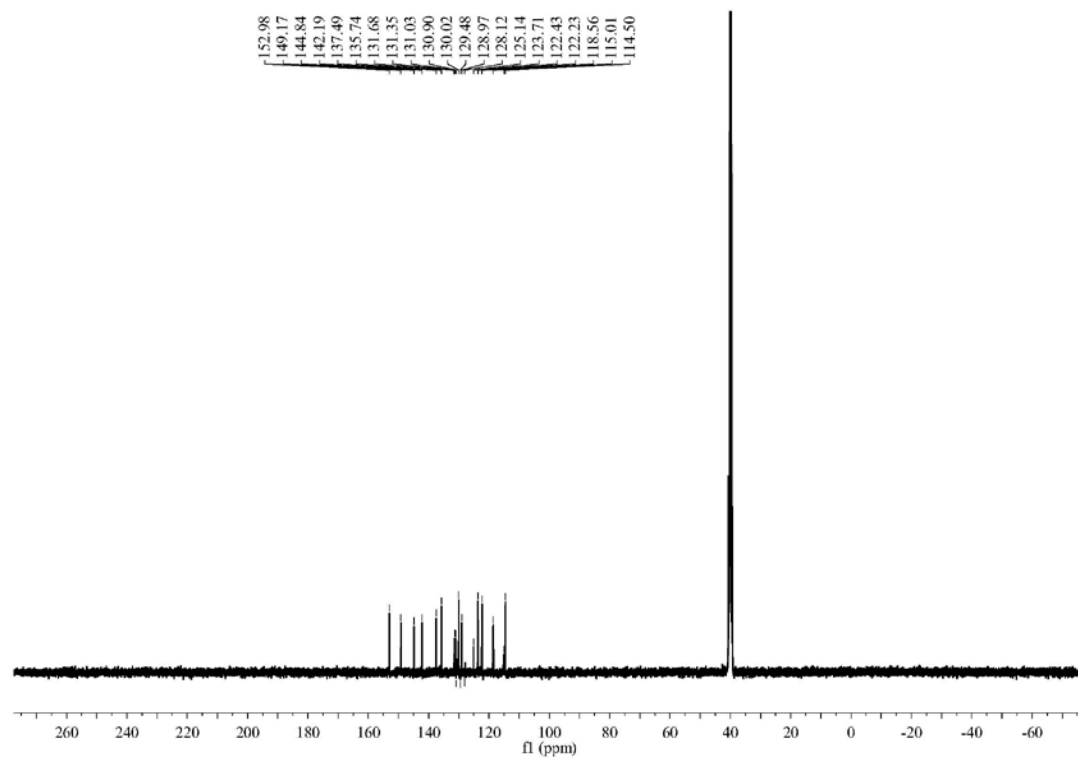

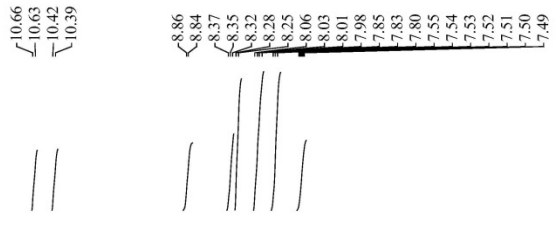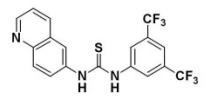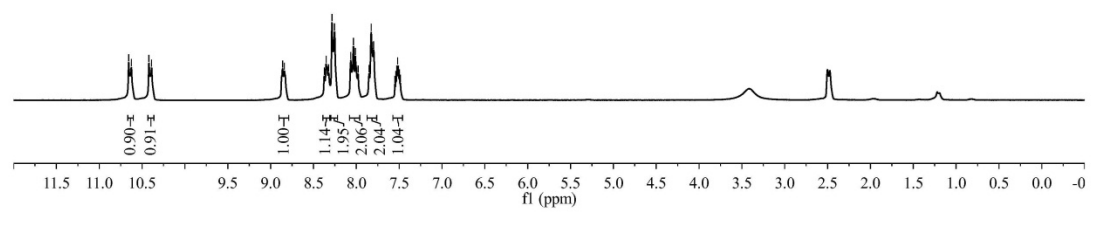

Supplement: c5qo00305a1.pdf [file c5qo00305a1.pdf]
